# Supplementary material for: Changing relationships: how does patient involvement transform professional identity? An ethnographic study
Source: PubMed Central journal article supplement — BMJ Open. 2021 Jul 9;11(7):e045520. doi: 10.1136/bmjopen-2020-045520 (PMC8273447; doi:10.1136/bmjopen-2020-045520), 2021-07-09
Supplement: bmjopen-2020-045520.draft_revisions.pdf [file bmjopen-2020-045520.draft_revisions.pdf]

# BMJ Open

BMJ Open is committed to open peer review. As part of this commitment we make the peer review history of every article we publish publicly available.

When an article is published we post the peer reviewers' comments and the authors' responses online. We also post the versions of the paper that were used during peer review. These are the versions that the peer review comments apply to.

The versions of the paper that follow are the versions that were submitted during the peer review process. They are not the versions of record or the final published versions. They should not be cited or distributed as the published version of this manuscript.

BMJ Open is an open access journal and the full, final, typeset and author-corrected version of record of the manuscript is available on our site with no access controls, subscription charges or pay-per-view fees (<http://bmjopen.bmj.com>).

If you have any questions on BMJ Open's open peer review process please email [info.bmjopen@bmj.com](mailto:info.bmjopen@bmj.com)

# BMJ Open

## Changing relationships: How does patient involvement transform professional identity? An ethnographic study

|                               |                                                                                                                                                                                                                                                                                                                                                                                                                                                                                                                                                                                                                                       |
|-------------------------------|---------------------------------------------------------------------------------------------------------------------------------------------------------------------------------------------------------------------------------------------------------------------------------------------------------------------------------------------------------------------------------------------------------------------------------------------------------------------------------------------------------------------------------------------------------------------------------------------------------------------------------------|
| Journal:                      | <i>BMJ Open</i>                                                                                                                                                                                                                                                                                                                                                                                                                                                                                                                                                                                                                       |
| Manuscript ID                 | bmjopen-2020-045520                                                                                                                                                                                                                                                                                                                                                                                                                                                                                                                                                                                                                   |
| Article Type:                 | Original research                                                                                                                                                                                                                                                                                                                                                                                                                                                                                                                                                                                                                     |
| Date Submitted by the Author: | 05-Oct-2020                                                                                                                                                                                                                                                                                                                                                                                                                                                                                                                                                                                                                           |
| Complete List of Authors:     | Codsi, Marie-Pierre; University of Montreal Faculty of Medicine, Department of family medicine<br>Karazivan, Philippe; University of Montreal Faculty of Medicine, Department of family medicine; CHUM, Center of Excellence for Partnership with Patients and the Public<br>Rouly, Ghislaine; CHUM, Center of Excellence for Partnership with Patients and the Public<br>Leclaire, Marie; University of Montreal Faculty of Medicine, Department of family medicine<br>Boivin, A; University of Montreal Faculty of Medicine, Department of family medicine; CHUM, Center of Excellence for Partnership with Patients and the Public |
| Keywords:                     | Change management < HEALTH SERVICES ADMINISTRATION & MANAGEMENT, Health policy < HEALTH SERVICES ADMINISTRATION & MANAGEMENT, Quality in health care < HEALTH SERVICES ADMINISTRATION & MANAGEMENT, MEDICAL ETHICS, QUALITATIVE RESEARCH                                                                                                                                                                                                                                                                                                                                                                                              |
|                               |                                                                                                                                                                                                                                                                                                                                                                                                                                                                                                                                                                                                                                       |

SCHOLARONE™  
Manuscripts

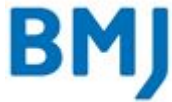

I, the Submitting Author has the right to grant and does grant on behalf of all authors of the Work (as defined in the below author licence), an exclusive licence and/or a non-exclusive licence for contributions from authors who are: i) UK Crown employees; ii) where BMJ has agreed a CC-BY licence shall apply, and/or iii) in accordance with the terms applicable for US Federal Government officers or employees acting as part of their official duties; on a worldwide, perpetual, irrevocable, royalty-free basis to BMJ Publishing Group Ltd ("BMJ") its licensees and where the relevant Journal is co-owned by BMJ to the co-owners of the Journal, to publish the Work in this journal and any other BMJ products and to exploit all rights, as set out in our [licence](#).

The Submitting Author accepts and understands that any supply made under these terms is made by BMJ to the Submitting Author unless you are acting as an employee on behalf of your employer or a postgraduate student of an affiliated institution which is paying any applicable article publishing charge ("APC") for Open Access articles. Where the Submitting Author wishes to make the Work available on an Open Access basis (and intends to pay the relevant APC), the terms of reuse of such Open Access shall be governed by a Creative Commons licence – details of these licences and which [Creative Commons](#) licence will apply to this Work are set out in our licence referred to above.

Other than as permitted in any relevant BMJ Author's Self Archiving Policies, I confirm this Work has not been accepted for publication elsewhere, is not being considered for publication elsewhere and does not duplicate material already published. I confirm all authors consent to publication of this Work and authorise the granting of this licence.

# Changing relationships: how does patient involvement transform professional identity?

## An ethnographic study

MP Codsí, P Karazivan, G Rouly, M Leclaire, A Boivin

### Copyright

I, Marie-Pierre Codsí, has the right to grant on behalf of all authors and does grant on behalf of all authors, an exclusive licence on a worldwide basis to the BMJ Publishing Group Ltd to permit this article (if accepted) to be published in BMJ editions and any other BMJGL products and sublicences such use and exploit all subsidiary rights, as set out in our licence.

### Competing interest's declaration:

All authors have completed the ICMJE uniform disclosure form at [www.icmje.org/coi\\_disclosure.pdf](http://www.icmje.org/coi_disclosure.pdf) and declare:

- MPC, GR, PK and AB are part of the CEPPP team (Center of Excellence for Partnership with Patients and the Public ). AB and PK are both Co-directors of the Center of Excellence for Partnership with Patients and the Public in Montreal; AB is the Chairholder of the Canada Research Chair in Patient and Public Partnership ;
- This project received the Patient's Medical Home 60/20 Caring and Compassion Grant (4000\$) and the University of Montreal Interfaculty Operational Committee grant (7500\$).

I, Marie-Pierre Codsí, affirms that the researchers work was totally independent from funders.

1  
2  
3 We declare no other relationships or activities that could appear to have influenced the  
4 submitted work.  
5  
6  
7

### 8 **Contributorship statement**

9

10 This study was conducted in the context of primary author's Master degree (MPC). MPC,  
11 PK, GR and AB designed and conducted the study. The data collection was done by MPC.  
12 The data analysis was done by all co-authors. MPC prepared the manuscript draft with  
13 important intellectual input from all the other co-authors. All authors approved the final  
14 manuscript.  
15  
16  
17  
18  
19  
20

21 **Guarantor:** Marie-Pierre Codsì ([marie-pierre.codsi@umontreal.ca](mailto:marie-pierre.codsi@umontreal.ca))  
22  
23  
24

25 **Transparency declaration:** I, Marie-Pierre Codsì, affirms that this manuscript is an honest,  
26 accurate, and transparent account of the study being reported; that no important aspects  
27 of the study have been omitted; and that any discrepancies from the study as planned  
28 have been explained.  
29  
30  
31  
32  
33

34 **Ethics approval:** The project was approved by the ethics committee for research on  
35 addiction, social inequalities, and public health of the *CIUSSS Centre-Sud-de-l'Île-de-*  
36 *Montréal* (DIS-1718-38).  
37  
38  
39  
40  
41

42 **Funding:** This project received the Patient's Medical Home 60/20 Caring and Compassion  
43 Grant (4000\$) and the University of Montreal Interfaculty Operational Committee grant  
44 (7500\$).  
45  
46  
47  
48

49 *Details of the role of the study sponsors:* I, Marie-Pierre Codsì, affirms that the  
50 researchers work was totally independent from funders.  
51  
52  
53  
54  
55  
56  
57  
58  
59  
60

1  
2  
3 **Patient and public involvement:** One patient partner (GR) was involved at several stages  
4 of the study, at the same level of the others co-researchers (PK, ML and AB). All the  
5 project's important decisions were discussed and decided in partnership with the patient.  
6 All the co-researchers met on a regular basis for the duration of the project. The patient  
7 partner was involved in the discussion and creation of the study protocol, the ethics  
8 procedures, the data analysis and the present article's manuscript. She contributed to the  
9 dissemination plan through being a co-presenter for congress abstract presentations and  
10 through the co-authoring of this present manuscript.  
11  
12  
13  
14  
15  
16  
17

18  
19  
20 **Dissemination declaration:** We plan to disseminate the results to study participants  
21 and to patient organisations.  
22  
23

24  
25 **Data sharing:** Data are available upon reasonable request (Individual participant data  
26 that  
27 underlie the results reported in this article, after deidentification, study protocol,  
28 informed Consent Form, Analytic Code).  
29  
30  
31  
32  
33  
34

35  
36 **\*\*\*This article follows the guidelines by the European Medical Writers' Association on**  
37 **the role of professional medical writers. \*\*\***  
38  
39  
40  
41  
42  
43  
44  
45  
46  
47  
48  
49  
50  
51  
52  
53  
54  
55  
56  
57  
58  
59  
60

1  
2  
3  
4  
5  
6  
7  
8  
9  
10  
11  
12  
13  
14  
15  
16  
17  
18  
19  
20  
21  
22  
23  
24  
25  
26  
27  
28  
29  
30  
31  
32  
33  
34  
35  
36  
37  
38  
39  
40  
41  
42  
43  
44  
45  
46  
47  
48  
49  
50  
51  
52  
53  
54  
55  
56  
57  
58  
59  
60

For peer review only

## Summary box

### Section 1: What is already known on this topic

- 1- Studies conducted in the wake of patient involvements have identified the emergence of several barriers and resistances from health professionals.
- 2- Implementation strategies for patient involvement have largely focused on education and the use of “involvement toolkits” addressing practical barriers, knowledge and attitudes.
- 3- No study, to our knowledge, has focused on understanding the potential identity tensions between patients and professionals when they are called to interact outside of a simple therapeutic relationship.

### Section 2: What this study adds

- 4- Working with patients is transforming the “caregiver–patient” relationship into a “colleague-colleague” relationship generates identity tensions among health professionals, related to competing ideals of the “good professional”, challenging the impermeability of the patient-professional categories, and questioning appropriate relational distance with patients.
- 5- Working with patients does not, for the professional, imply a purely “collegial” relationship, but rather the construction of a new relational framework, flexible and dynamic, that takes into account the co-existence of multiple identities.
- 6- Professional identity tension could be further explored to understand barriers to implementation in certain settings and inform implementation strategies.



## ABSTRACT (250 WORDS)

**Objectives:** Understand identity tensions experienced by health professionals when partnership with patients on a quality improvement committee.

**Design:** Qualitative ethnographic study based on participatory observation.

**Setting:** Interdisciplinary quality improvement committee conducted in a urban academic family medicine clinic in Canada with little previous experience in patient involvement.

**Participants:** All committee members were invited to participate in the study: two patient partners, seven professionals (two family physicians, two residents, one pharmacist, one nurse clinician, one specialized nurse practitioner), one secretary, one receptionist, and one manager.

**Data collection:** Data collection included participatory observations, logbook notes, and semi-structured interviews, collected between the summer of 2017 to the summer 2019.

**Data analysis:** Ghadiri's theoretical framework on identity threats used to analyse qualitative material and develop conceptualizing categories, using QDA miner software.

**Results:** All professionals and patient partners (n=9) accepted to participate in the ethnographic study and semi-structured interviews (RR=100%). Transforming the "caregiver-patient" relationship into a "colleague-colleague" relationship generated identity upheavals among professionals. Identity tensions included competing ideals of the "good professional", challenges to the impermeability of the patient and professional categories, the interweaving of symbols associated with one or the other of these identities, and the inner balance between the roles of carer and colleague.

**Conclusion:** Our results provide an interpretive reading that is different from the current literature, shedding light on underlying identity tensions that could explain challenges in implementing patient involvement interventions in professional settings. This could help understand barriers to patient involvement initiatives in certain settings and inform implementation strategies.

## ARTICLE SUMMARY (STRENGTHS, LIMITATIONS OF THIS STUDY)

- The methodology used (participatory ethnographic approach) carried out over a period of more than two years, greatly enriched the understanding of the phenomenon under study, allowing researchers to have access to formal and informal corridor discussions that helped uncover identity tensions that were not obvious in initial interviews.
- The important contribution of this methodology is to import an identity analytical framework from the business scientific literature to help understand challenges of patient partnership implementation and to provide an interpretive reading that is different from the current literature, shedding light on certain issues frequently encountered in the field.
- Because the ethnographic approach was used in a single setting, the analysis focused more on professionals' individual identity, whereas a multiple case study in several types of professional environments would have made it possible to contrast the impact of relational changes on professionals' collective identity.
- To uncover as many potential issues as possible, we chose to study a team undergoing its first experience of working in partnership with patients.
- Working with a team that was relatively new to the subject was potentially more conducive to exposing the identity shock that resulted when relationships were transformed from caregiver–patient to colleague–colleague.

# ARTICLE: CHANGING RELATIONSHIPS: HOW DOES PATIENT INVOLVEMENT TRANSFORM PROFESSIONAL IDENTITY?

An ethnographic study

*"It is in these roles that we know each other; it is in these roles that we know ourselves."* (1)

## 1.1 Introduction

Over the past decades there have been growing calls for greater patient and public involvement (PPI) in health care systems around the world (2-7). The PPI movement is today one of the main vectors for creating different initiatives and new models of care (8-16). Despite the problematic context of the COVID 19 pandemic, many new initiatives are now recruiting patients to help rethink policies (20, 21) and medical education (22).

Studies conducted in the wake of PPI initiatives have identified the emergence of several barriers and resistances. Questions have arisen about patients' status within teams (23, 24), the legitimacy of their knowledge and contribution (24-26), the impacts on care quality (4, 6), and the new power relationships being formed within healthcare teams and the health system (27, 28). While some have attempted to understand the issues raised by such experiences (25, 28-30), no study, to our knowledge, has focused on understanding the potential identity tensions between patients and professionals when they are called to interact outside of a simple therapeutic relationship. Professionals and patients' identities are fundamentally based on a caregiving relationship in which professionals are responsible for caring for the patient (31). However, many new care models posit that patients should be integrated as partners to contribute to quality improvement, medical research, teaching programs, and health institution governance (6, 10, 29, 32, 33). This aims to involve them directly in all stages of decision-making (34). Working with patients not as caregiver, but as partner, directly affects the traditional way of doing (35).

1  
2  
3  
4  
5 Empirical studies in the business sector (36-38) have examined identity tensions occurring  
6 during important organizational changes, in order to help understand different reactions  
7 to change. The present study thus examined the identity tensions that can arise when  
8 patients and health professionals begin working together as partners, and specifically  
9 how these tensions are experienced on the ground by health professionals. Uncovering  
10 these tensions could bring a deeper understanding of professional barriers and resistance  
11 to PPI (25), and potentially reorient implementation strategies.  
12  
13  
14  
15  
16  
17  
18  
19

## 20 1.2 Methodology

21  
22 **Objective.** To understand the identity tensions experienced by health professionals when  
23 partnering with patients on a quality improvement committee.  
24  
25

26  
27 **Design.** Participatory ethnographic study.  
28  
29

30 **Conceptual model.** This study was based on the conceptual model of identity threats  
31 developed by Ghadiri (2014). According to Ghadiri's model, identity answers the  
32 fundamental question, "who am I?". Identity changes and is transformed in response to  
33 several factors: personal characteristics, context, sense of belonging, relationships with  
34 others, and how others view us. Individuals or social groups are strongly attached to their  
35 identity. If that identity is threatened, individuals and groups will defend it strongly,  
36 whether consciously or not. Identity can manifest in different ways, but some forms are  
37 more susceptible to tension when change occurs. Ghadiri calls these forms "identity  
38 markers": stories, ideals, balances, categorizations, and symbols. These five markers have  
39 the potential to trigger an identity crisis when they are shaken up.  
40  
41  
42  
43  
44  
45  
46  
47  
48

49 *Stories* are ways in which the identity of the group or individual is told. Individuals may be  
50 threatened when, for example, a change prevents them from identifying with a story that  
51 was particularly dear to them. *Ideals* are conceptions or aspirations that we wish to  
52 achieve. A change can be experienced as a threat if it poses an obstacle to attaining this  
53  
54  
55  
56  
57  
58  
59  
60

1  
2  
3 ideal. An individual or group may have several concurrent identities, which coexist in a  
4 sometimes delicate *balance*. A change can be experienced as a threat if it disrupts this  
5 balance. *Categorizations* are labels explicitly or implicitly associated with an individual or  
6 group of individuals. They are manifested, among other things, by the ways in which  
7 individuals are valued or treated according to the category to which they belong. Finally,  
8 *symbols* can be manifested in elements such as attire, access to premises, etc. Identity  
9 can be threatened, “whether by eliminating symbols, disrupting them, eroding them,  
10 replacing them, denying access, or making their expression difficult...” (Ghadiri, 2014, p.  
11 43).

12  
13  
14  
15  
16  
17  
18  
19  
20  
21  
22  
23 **Study context.** In 2017, a family medicine clinic created a interdisciplinary quality  
24 improvement committee. The clinic was a large academic primary care group practice  
25 located in Montreal, with a longstanding tradition of interprofessional care, but no  
26 previous experience with patient involvement in quality improvement.

27  
28  
29  
30  
31 The quality improvement committee functioned from summer 2017 to summer 2019. Its  
32 mandate was to optimize the management of laboratory results at the clinic. PP involved  
33 on the committee were recruited by the clinic staff during in the fall of 2017 using the  
34 Centre of Excellence for Patient and Public Partnership recruitment methodology (39).

35  
36  
37  
38  
39  
40 **Study participants.** All members of the committee were invited to participate. In this  
41 ethnographic approach, both MPC (family medicine resident), PK (family physician) and  
42 GR (patient partner) were both committee members as well as researchers.

43  
44  
45  
46  
47 **Data collection.** Data collection began in 2017, when the committee was officially  
48 created, and ended in winter 2019. It consisted of participatory observations, logbook  
49 notes, and semi-structured interviews. Participatory observations included involvement  
50 in the recruitment of PP and attendance of all committee meetings. The logbook captured  
51  
52  
53  
54  
55  
56  
57  
58  
59  
60

1  
2  
3 summaries of participants' interventions during the meetings, the decisions taken by the  
4 committee, and a summary of informal discussions among committee members.  
5  
6

7  
8 Semi-structured interviews were conducted with professionals and PP. The questions in  
9 the interview guide were developed on the basis of Ghadiri's identity markers.  
10  
11

12  
13 **Data analysis.** Qualitative ethnographic analysis by conceptualizing categories was used.  
14 Data were compiled using QDA Miner software (version 5.0). Analysis was begun  
15 alongside data collection and used iteratively to enhance the data collection itself. The  
16 data was then coded by the principal investigator (MPC) and grouped around major  
17 emerging themes, analyzed using Ghadiri's conceptual framework. The coding was  
18 entirely revised by ML to enhance trustworthiness and supervised again by AB and PK.  
19 The results were revised with all the research team (MPC, PK, GR, ML, AB).  
20  
21  
22  
23  
24  
25  
26

27  
28 **Ethics approval.** Approved by the ethics committee for research on addiction, social  
29 inequalities, and public health of the *CIUSSS Centre-Sud-de-l'Île-de-Montréal* (DIS-1718-  
30 38).  
31  
32

33  
34 **Patient and public involvement.** One patient partner (GR) was involved at several stages  
35 of the study, at the same level of the others co-researchers (PK, ML and AB). All the  
36 project's important decisions were discussed and decided in partnership with the patient.  
37 All the co-researchers met on a regular basis for the duration of the project. She was  
38 involved in the discussion and writing of the study protocol, the ethics procedures, the  
39 data analysis and the present article's manuscript. She contributed to the dissemination  
40 plan through being a co-presenter for congress abstract presentations and through the  
41 co-authoring of this present manuscript.  
42  
43  
44  
45  
46  
47  
48  
49  
50  
51  
52  
53  
54  
55  
56  
57  
58  
59  
60

### 1.3 Results

**Participants.** The committee consisted of two PP, seven health professionals (two family physicians, two family medicine residents, one pharmacist, one nurse clinician and one specialized nurse practitioner), one secretary, one receptionist, and one manager. All participants accepted to participate in the ethnographic research. All health professionals and PP (n=9) accepted to participate to the interviews (RR=100%).

#### **Identity markers:**

##### *1. Stories: pioneers threatened in their image of excellence*

In interviews, professionals reported a shared collective story that their clinic had always been known for its strong focus on innovation and quality of care. They all thought that this new experience of partnering with patients was thus in line with the clinic's tradition, being rooted in a collective identity of innovation. All concurred that patients had been integrated as full members of the team during the committee's work. In their initial comments, no conflicts or tensions were reported: a committee in which their professionals' collective identity story of innovators was enhanced and did not seem to have been disrupted in any way (cf Table 1.1.a). However, when probed deeper, particularly in corridor conversations, professionals indicated that the PP's inclusion was not accomplished without fear or apprehension (cf Table 1.1.b).

Table 1. Identity markers : Citations and observations collected

| Identity markers | Citations and observations collected                                                                                                                                                                                                                                                                                                                                                                                                                                                                                                                                                                                                                                                                                                                                                                                                                                                                                                          |
|------------------|-----------------------------------------------------------------------------------------------------------------------------------------------------------------------------------------------------------------------------------------------------------------------------------------------------------------------------------------------------------------------------------------------------------------------------------------------------------------------------------------------------------------------------------------------------------------------------------------------------------------------------------------------------------------------------------------------------------------------------------------------------------------------------------------------------------------------------------------------------------------------------------------------------------------------------------------------|
| 1.Stories        | <p>a. Citation: “I see everyone is comfortable. I don't feel that... there's any discomfort. I find there's not really any... people aren't holding back, because I know them, and what they're saying, it's what they say in general in their everyday life. It's in the spirit of the times... It wasn't something that... we were against. No one was against that.” – Professional</p> <p>b. Citation: “Well, I don't think anyone said.... It's not conscious, but to a certain extent, we're afraid of each other.” – Professional</p> <p>c. Citation: “When we explained our internal problems [in front of patients as partner], it was a little embarrassing, because normally we're supposed to be perfect. That's how it is, in fact, it's like a perfect image. Then, there, we took them behind the scenes.... So then it was a bit embarrassing [to admit] “we're not perfect, you know.” – Professional</p>                    |
| 2.Ideals         | <p>Citation: “This is a departmental priority. Besides that, it's become a priority for the [health authority], it's become a priority for everyone.... They all feel there's a lot of pressure for us to be endorsed by the “patient partner” brand.” – Professional</p>                                                                                                                                                                                                                                                                                                                                                                                                                                                                                                                                                                                                                                                                     |
| 3.Balance        | <p>a. Citation: “We may well be colleagues, but still, they're patients, and I always feel the... urge to provide care, and then we said: ‘we want them to be happy, and do well in there, and feel valued.’” – Professional</p> <p>b. Citation: “I'd say that, when it's a colleague, I feel more able to confront him.... But when it's a patient... you have to wear... in my thinking, anyway... because he represents the good folks, you have to treat them with kid gloves more often.” – Professional</p> <p>c. Citation: “(...) At the same time, I see it as a bias, because we're working with two patients who are used to work on committees.” – Professional</p>                                                                                                                                                                                                                                                                |
| 4.Categorization | <p>a. Citation: “The most important thing for me is to clarify the role, what we're doing around the table, and why we're all here.” – Professional</p> <p>b. Citation: “Then, because everyone is also a patient... I think that's why... but our patient is more of a patient than we are, his role is to bring that... You know, us, it's not really our role to bring our role as a patient there, either... ” – Professional</p> <p>c. Observations: Patient partner legitimacy and their ability to distinguish their identity from those of professionals increased in certain situations:</p> <ol style="list-style-type: none"> <li>I. when PP surprised the team with information or suggestions based on their own care experience that none of the professionals had previously experienced or considered</li> <li>II. when PP contradicted a preconceived notion held by professionals regarding patients' experience</li> </ol> |



|           |                                                                                                                                                                                                                                                                        |
|-----------|------------------------------------------------------------------------------------------------------------------------------------------------------------------------------------------------------------------------------------------------------------------------|
|           | III. when PP were able to touch team members emotionally with their personal experience of care.                                                                                                                                                                       |
| 5.Symbols | a. Citation: “If I were asked to be a patient partner, I’d like to be paid. Just to say you have a value. It’s not just volunteering. It’s crazy, because we have a system [in which] basically, after all... it seems that your salary is your worth.” – Professional |

During the field observations, there was a level of anxiety felt by professionals during the first interactions with PP. When certain quality problems were discussed, professionals were particularly attentive to the PP’ reactions, as these discussions were threatening professionals’ collective story of clinical excellence (cf Table 1.1.c). If PP expressed surprise or disappointment, some professionals quickly sought to minimize the impact of the problem or defend the professionals’ reality.

The way in which the professionals spontaneously described their experience was in line with their collective identity story of innovators, working in a pioneer primary care practice. However, corridor discussions revealed a fear that PP’ presence in the “backstage” of professional practice could uncover “imperfections” or “shortcomings” that would undermine professionals’ identity story of excellence.

## 2. *Ideals: Partnership with patients, a new professional ideal*

All professionals concurred that working in partnership is the new “right thing to do” (cf Table 1.2). The professionals therefore worked to ensure the success of the experience to be “good” partners. Professionals mentioned that their relationship with patients should not be hierarchical, but rather built on reciprocity and transparency. Disagreements should be expressed freely and without filters. Our field observations showed that professionals and patients working together felt a need to show stronger connections between each other than what usually occurs in clinical care. For example, the use of informal terms of address (eg. using first names), the sharing of personal

1  
2  
3 stories, and demonstrations of camaraderie between patients and professionals were  
4 methods routinely used to demonstrate that they were not in a caregiver relationship,  
5 and to illustrate that the professionals were successful in embodying this perception of  
6 the new non-hierarchical relationship ideal.  
7  
8  
9

10  
11 *3. Balance: Identity tensions between patients as colleagues and people being care for*  
12

13 For professionals, PP have two competing identities, with which they must deal  
14 simultaneously. Even as the professionals aimed to consider PP as colleagues, interviews  
15 showed they also viewed them as innocent, vulnerable beings that they felt responsible  
16 for (cf Table 1.3.a).  
17  
18  
19  
20  
21

22 After all, the PP who joins the committee is still a patient of the clinic and, as such, a  
23 recipient of care. Consequently, the professionals were afraid to confront them, at least  
24 openly, as professionals perceive confronting patients as morally reprehensible (cf Table  
25 1.3.b).  
26  
27  
28  
29

30 If a PP distances himself from the “ordinary” patient, and shows abilities to ascertain  
31 himself as full member of the team, professionals would consider him a part of the  
32 “professional family”. However, this was seen as a negative element by the professionals,  
33 since the PP would no longer be able to adequately embody the identity of an ordinary  
34 patient and would be too far removed from the “real world” (cf Table 1.3.c). This issue  
35 was repeatedly expressed by professionals as a concern regarding the insufficient  
36 “representativeness” of the PP.  
37  
38  
39  
40  
41  
42  
43  
44

45 Corridor conversations and direct observations also revealed another identity tension  
46 among professionals regarding the balance between their identity as colleague and as  
47 caregiver: if a PP asked for a medically-related personal service (e.g. help getting an  
48 appointment with a doctor, medical advice, or a referral), the professional felt  
49 uncomfortable and hesitated about the correct way to respond to this request (as a  
50 doctor? A colleague? A friend?).  
51  
52  
53  
54  
55  
56  
57  
58  
59  
60

#### 4. *Categorization: The newcomer, boundaries to be defined*

All participants concurred that an essential factor for the success of such an experience is that everyone has a clear understanding of the boundaries between PP and professionals' roles. Yet, for professionals, the definition of the PP role remained ambiguous. This complicated the way professionals viewed the PP's category (cf Table 1.4.a). Some professionals noted that if the discussion touched them personally, they tended to recall their own experiences as a patient. Thus, they considered that the "patient" label could be applied to them as well. Professionals therefore expected PP to bring to the table knowledge that was different from that of other team members (cf Table 1.4.b).

Moreover, we observed that PP's legitimacy and their ability to distinguish their identity from those of professionals increased in certain situations (cf Table 1.4.c). Such cases establish an identity boundary that distinguished them from professionals as "colleagues with a different expertise".

#### 5. *Symbols: Remuneration, as a symbolic identity issue*

Several identity symbols were challenged by PP involvement in the committee. Notably, PP's remuneration raised not only financial questions, but also questions around roles and status. Beyond its practical implications (Should they be paid? How much? Who should pay?), remuneration debates crystalized identity questions (eg. Did a salary imply employee status? How does it distinguish patient partners with professionals' roles?). Opinions were divided among participants. If remuneration was unconceivable when looking at patients as individuals receiving care, professionals arguing in favour of remuneration adopted a logic of PP being compensated as colleagues whose value is reflected in its salary (cf Table 1.5.a.).

Other symbols also have encountered some resistance from institutions, rooted in the dual identity of patient partners as colleagues and users of care. Granting PP clinic access

card and the nature of their confidentiality obligations were the subject of several discussions in the committee.

#### 1.4 Discussion

This study reports and interprets how working with patients is a new way of entering into relationships and how this transforms the identity of professionals. Even if, in this study, all participants agreed that the experience was a success in terms of partnership with patients, transforming the “caregiver–patient” relationship into a “colleague–colleague” relationship generated identity upheavals among the professionals, relating to the “good professional” ideal, the impermeability of the patient and professional categories, the interweaving of the symbols associated with these identities, and the inner balance between the roles of carer and colleague. Our results, summarized in table 2, showed that these two relational models are based on identity ideals with potentially conflicting requirements (issues of relational distance, objectives and sharing of responsibilities). Professionals place a dual identity requirement on the PP, who must embody the characteristics of both a work colleague and a patient requiring care. This could explain some professionals’ perception of PP identity mentioned in the literature as ambiguous and poorly defined (23, 40).

Table 2. Characteristics of each relational model as perceived by professionals

|                                                    | Caregiver-patient relationship  | Colleague-colleague relationship |
|----------------------------------------------------|---------------------------------|----------------------------------|
| <b>Identity of physician</b>                       | Caregiver                       | Colleague                        |
| <b>Identity of patient</b>                         | Recipient of care               | Colleague                        |
| <b>Relational distance</b>                         | Asymmetrical                    | Symmetrical                      |
| <b>Relational objective (for the professional)</b> | Care                            | Work                             |
| <b>Responsibility</b>                              | Carried mainly by professionals | Shared                           |

1  
2  
3  
4  
5  
6 Given the coexistence of multiple identities, striking a balance between them brings many  
7 challenges for the professional. While balancing identities is complex, the professional  
8 cannot relinquish either of his identity ideals without consequence. On one hand, if the  
9 patient is sufficiently distanced from this image of someone requiring care, that patient  
10 can then be viewed as part of the professional family, as a full colleague. The energy will  
11 be focused more on productivity than on creating a positive relational experience. On the  
12 other hand, if the patient partner is too removed from what is considered an “ordinary  
13 patient” identity, the professional will consider the person’s presence to be less  
14 legitimate, even irrelevant. This is mainly because the professional grants the person  
15 legitimacy on the basis of a patient identity, while giving the person access to real  
16 relational reciprocity on the basis of a co-worker identity. Partnership with patients imply  
17 the construction of a new relational framework, flexible and dynamic, that takes into  
18 account this co-existence of identities.  
19  
20  
21  
22  
23  
24  
25  
26  
27  
28  
29  
30

31 The important contribution of this study is to import an identity analytical framework to  
32 help understand challenges of PP implementation. This provide an interpretive reading  
33 that is original and different from the current literature, shedding light on certain  
34 professionals’ concerns toward patient “representativeness” frequently mentioned in the  
35 literature (26, 29, 41, 42).  
36  
37  
38  
39  
40

41 Other issues frequently encountered in the field (4, 23-26, 28, 29, 40-43) (e.g  
42 professionals’ resistance to working with patients, merely symbolic involvement of  
43 patients, remuneration, patients’ status and unequal power relationships between  
44 professionals and PP) could be indicative of underlying identity tensions between  
45 patients’ role as recipient of care or colleague.  
46  
47  
48  
49  
50

### 51 **Strengths, limitations, and future research**

52  
53

54 The methodology used (participatory ethnographic approach) carried out over a period  
55 of more than two years, greatly enriched the understanding of the phenomenon under  
56  
57  
58  
59  
60

1  
2  
3 study, allowing researchers to have access to formal and informal corridor discussions  
4 that helped uncover identity tensions that were not obvious in initial interviews. This  
5 methodology follows in the footsteps of recent literature striving for the study of  
6 complexity in health services (33-36). However, because the ethnographic approach was  
7 used in a single setting, the analysis focused more on professionals' individual identity,  
8 whereas a multiple case study in several types of professional environments would have  
9 made it possible to contrast the impact of relational changes on professionals' collective  
10 identity. To uncover as many potential issues as possible, we chose to study a team  
11 undergoing its first experience of working in partnership. It would be interesting to see  
12 whether similar results would emerge with a more experienced team, in which the  
13 balance between the different identities might have already stabilized to some extent  
14 over time. On the other hand, working with a team that was relatively new to the subject  
15 was potentially more conducive to exposing the identity shock that resulted when  
16 relationships were transformed from caregiver–patient to colleague–colleague. Finally,  
17 future research is needed to better understand identity issues experienced by patient  
18 partners.  
19  
20  
21  
22  
23  
24  
25  
26  
27  
28  
29  
30  
31  
32  
33

### 34 **1.5 Conclusion**

35  
36  
37  
38 This research provides a new and important perspective on understanding how working  
39 in partnership with patients transform professionals' identity. This could help to better  
40 analysed practical issues and resistances elicited by the arrival of different patient  
41 engagement initiatives.  
42  
43  
44  
45  
46

47 It is important to consider, however, whether creating identity tensions, if this is not, in  
48 essence, the very strength of working in partnership with patients. Perhaps the same  
49 question would need to be considered yet again if this ambiguity and relational  
50 discomfort were to disappear and be replaced by a relationship that is too "complacent".  
51  
52  
53  
54  
55  
56  
57  
58  
59  
60

1  
2  
3  
4  
5  
6  
7  
8  
9  
10  
11  
12  
13  
14  
15  
16  
17  
18  
19  
20  
21  
22  
23  
24  
25  
26  
27  
28  
29  
30  
31  
32  
33  
34  
35  
36  
37  
38  
39  
40  
41  
42  
43  
44  
45  
46  
47  
48  
49  
50  
51  
52  
53  
54  
55  
56  
57  
58  
59  
60

For peer review only

## Bibliography

1. Park RE. Race and culture: Free Press; 1950. 403 p.
2. Fleurence R, Selby JV, Odom-Walker K, Hunt G, Meltzer D, Slutsky JR, et al. How the Patient-Centered Outcomes Research Institute is engaging patients and others in shaping its research agenda. *Health Affairs*. 2013;32(2):393-400.
3. Research NIhH. Patient and public involvement in health and social care research: A handbook for researchers. 2014.
4. Bombard Y, Baker GR, Orlando E, Fancott C, Bhatia P, Casalino S, et al. Engaging patients to improve quality of care: a systematic review. *Implementation Science*. 2018;13(1):98.
5. Russell J, Greenhalgh T, Taylor M. Patient and public involvement in NIHR research 2006-2019: policy intentions, progress and themes. 2019.
6. Aubin D, Hebert M, Eurich D. The importance of measuring the impact of patient-oriented research. *CMAJ: Canadian Medical Association journal= journal de l'Association medicale canadienne*. 2019;191(31):E860.
7. Patrick K. Realizing the vision of patient-relevant clinical research. *Can Med Assoc*; 2016.
8. Coulter A. Paternalism or partnership?: Patients have grown up—and there's no going back. *British Medical Journal Publishing Group*; 1999.
9. Richards T, Montori VM, Godlee F, Lapsley P, Paul D. Let the patient revolution begin. *British Medical Journal Publishing Group*; 2013.
10. Karazivan P, Dumez V, Flora L, Pomey MP, Del Grande C, Ghadiri DP, et al. The patient-as-partner approach in health care: a conceptual framework for a necessary transition. *Acad Med*. 2015;90(4):437-41.
11. Barry MJ, Edgman-Levitan S. Shared decision making—the pinnacle of patient-centered care. *New England Journal of Medicine*. 2012;366(9):780-1.
12. Bodenheimer T, Lorig K, Holman H, Grumbach K. Patient self-management of chronic disease in primary care. *Jama*. 2002;288(19):2469-75.
13. Tattersall RL. The expert patient: a new approach to chronic disease management for the twenty-first century. *Clin Med (Lond)*. 2002;2(3):227-9.
14. Collier R. Federal government unveils patient-oriented research strategy. *Can Med Assoc*; 2011.
15. Patrick K, Kebbe M, Aubin D. A home for patient-oriented research. *Can Med Assoc*; 2018.
16. Laupacis A. CMAJ priorities for 2020. *Can Med Assoc*; 2019.
17. Clavel N, Pomey M-P, Ghadiri DPS. Partnering with patients in quality improvement: towards renewed practices for healthcare organization managers? *BMC health services research*. 2019;19(1):815.
18. Flora L, Lebel P, Dumez V, Bell C, Lamoureux J, Saint-Laurent D. [Experimentation of care partners program in psychiatry: the model Montreal]. *Sante Ment Que*. 2015;40(1):101-17.
19. Boivin A, Flora L, Dumez V, Berkesse A, Gauvin FP. Co-construire la santé en partenariat avec les patients et le public : historique, approche et impacts du « modèle de Montréal ». In: Dalloz, editor. *La participation des patients*. Paris2017. p. 11.



20. Boivin A, Penafiel M, Rouly G, Lahaie V, Codsí M-P, Isabel M, et al. COVID-19: A pivotal moment in community care.. *BMJ*, editor2020. [cited 2020 2020-09-05]. Available from: <https://blogs.bmj.com/bmj/2020/04/07/covid-19-a-pivotal-moment-in-community-care/>
21. Quirion R. Création du Réseau québécois COVID. Gouvernement du Québec; 2020. Available from : <http://www.scientifique-en-chef.gouv.qc.ca/nouvelles/creation-du-reseau-quebecois-covid/>
22. Jackson M, Descoteaux A. Covid-19 and medical education: patients' teaching role moves online.. *BMJ*. [cited 2020 2020-09-05]. Available from: <https://blogs.bmj.com/bmj/2020/07/21/covid-19-and-medical-education-patients-teaching-role-moves-online/>.
23. Barber R, Boote JD, Parry GD, Cooper CL, Yeeles P, Cook S. Can the impact of public involvement on research be evaluated? A mixed methods study. *Health Expect*. 2012;15(3):229-41.
24. Lough S. Need to define patient engagement in research. *Can Med Assoc*; 2015.
25. Staniszewska S, Mockford C, Gibson A, Herron-Marx S, Putz R. Moving Forward: Understanding the Negative Experiences and Impacts of Patient and Public Involvement in Health Service Planning, Development, and Evaluation. *Critical perspectives on user involvement edn Edited by Barnes M, Cotterell P Bristol: Policy*. 2012:129-41.
26. Domecq JP, Prutsky G, Elraiyah T, Wang Z, Nabhan M, Shippee N, et al. Patient engagement in research: a systematic review. *BMC Health Services Research*. 2014;14(1):89.
27. Saraga M. Transparence, transfert et patient partenaire. *Psycho-Oncologie*. 2018;12(1):24-8.
28. O'Shea A, Boaz AL, Chambers M. A hierarchy of power: the place of patient and public involvement in healthcare service development. *Frontiers in Sociology*. 2019;4.
29. Montreuil M, Martineau JT, Racine E. Exploring Ethical Issues Related to Patient Engagement in Healthcare: Patient, Clinician and Researcher's Perspectives. *Journal of bioethical inquiry*. 2019:1-12.
30. Boivin A, Lehoux P, Burgers J, Grol R. What are the key ingredients for effective public involvement in health care improvement and policy decisions? A randomized trial process evaluation. *Milbank Quarterly*. 2014;92(2):319-50.
31. Parsons T. The sick role and the role of the physician reconsidered. *Milbank Mem Fund Q Health Soc*. 1975;53(3):257-78.
32. Boivin A, Richards T, Forsythe L, Grégoire A, L'Espérance A, Abelson J, et al. Evaluating patient and public involvement in research. *British Medical Journal Publishing Group*; 2018.
33. Aldcroft A. New requirements for patient and public involvement statements in *BMJ Open*. *BMJ Open*. 2018.
34. Carman KL, Dardess P, Maurer M, Sofaer S, Adams K, Bechtel C, et al. Patient and family engagement: a framework for understanding the elements and developing interventions and policies. *Health Aff (Millwood)*. 2013;32(2):223-31.
35. Richards T. Patient leaders—healthcare's untapped workforce. *TheBMJopinion* [Internet]. 2017. Available from: <https://blogs.bmj.com/bmj/2017/12/22/tessa-richards-patient-leaders-healthcares-untapped-workforce/>.

- 1  
2  
3 36. Conroy SA, O'Leary-Kelly AM. Letting go and moving on: Work-related identity  
4 loss and recovery. *Academy of Management Review*. 2014;39(1):67-87.  
5 37. Ghadiri DP. Quand le changement menace l'identité. *Gestion*. 2014;39(1):38-47.  
6 38. Ashforth BE, Schinoff BS, Rogers KM. "I identify with her," "I identify with  
7 him": Unpacking the dynamics of personal identification in organizations. *Academy of  
8 Management Review*. 2016;41(1):28-60.  
9 39. DCP. Guide de pratique: Recrutement des patients partenaires. Faculté de  
10 médecine: Université de Montréal; 2015.  
11 40. Brett J, Staniszewska S, Mockford C, Seers K, Herron-Marx S, Bayliss H. The  
12 PIRICOM Study: A systematic review of the conceptualisation, measurement, impact and  
13 outcomes of patients and public involvement in health and social care research. 2010.  
14 41. Maguire K, Britten N. "How can anybody be representative for those kind of  
15 people?" Forms of patient representation in health research, and why it is always  
16 contestable. *Social Science & Medicine*. 2017;183:62-9.  
17 42. Renedo A, Komporozos-Athanasiou A, Marston C. Experience as evidence: The  
18 dialogic construction of health professional knowledge through patient involvement.  
19 *Sociology*. 2018;52(4):778-95.  
20 43. Pomey M-P, Hihat H, Khalifa M, Lebel P, Néron A, Dumez V. Patient  
21 partnership in quality improvement of healthcare services: Patients' inputs and challenges  
22 faced. *Patient Experience Journal*. 2015;2(1):29-42.  
23  
24  
25  
26  
27  
28  
29  
30  
31  
32  
33  
34  
35  
36  
37  
38  
39  
40  
41  
42  
43  
44  
45  
46  
47  
48  
49  
50  
51  
52  
53  
54  
55  
56  
57  
58  
59  
60

1  
2  
3  
4  
5  
6  
7  
8  
9  
10  
11  
12  
13  
14  
15  
16  
17  
18  
19  
20  
21  
22  
23  
24  
25  
26  
27  
28  
29  
30  
31  
32  
33  
34  
35  
36  
37  
38  
39  
40  
41  
42  
43  
44  
45  
46

**SRQR Guidelines fo Qualitative Research**

|                                                                                         |            |
|-----------------------------------------------------------------------------------------|------------|
| <b>Title and abstract</b>                                                               |            |
| Title                                                                                   | p.1        |
| Abstract                                                                                | p.1        |
| <b>Introduction</b>                                                                     |            |
| problem formulation                                                                     | p.2        |
| purpose                                                                                 | p.3        |
| <b>Methods</b>                                                                          |            |
| Qualitative approach                                                                    | p.3        |
| researcher characteristics and reflexivity                                              | p.3        |
| context                                                                                 | p.4        |
| sampling strategy                                                                       | p.4        |
| ethical issu                                                                            | p.5        |
| data collection                                                                         | p.4        |
| units of study                                                                          | p.4        |
| data processing                                                                         | p.4        |
| data analysis                                                                           | p.4        |
| techniques to enhance trusworthiness                                                    | p.4        |
| <b>Results and findings</b>                                                             |            |
| synthesis and interpretation                                                            | p.8        |
| links to empirical data                                                                 | p.9        |
| <b>Discussion</b>                                                                       |            |
| integration to prior work, implications, transferability, adn contribution to the field | p.9        |
| limitations                                                                             | p.9        |
| <b>Others</b>                                                                           |            |
| conflicts of interest                                                                   | title page |
| funding                                                                                 | title page |

# BMJ Open

## Changing relationships: How does patient involvement transform professional identity? An ethnographic study

|                                 |                                                                                                                                                                                                                                                                                                                                                                                                                                                                                                                                                                                                                                       |
|---------------------------------|---------------------------------------------------------------------------------------------------------------------------------------------------------------------------------------------------------------------------------------------------------------------------------------------------------------------------------------------------------------------------------------------------------------------------------------------------------------------------------------------------------------------------------------------------------------------------------------------------------------------------------------|
| Journal:                        | <i>BMJ Open</i>                                                                                                                                                                                                                                                                                                                                                                                                                                                                                                                                                                                                                       |
| Manuscript ID                   | bmjopen-2020-045520.R1                                                                                                                                                                                                                                                                                                                                                                                                                                                                                                                                                                                                                |
| Article Type:                   | Original research                                                                                                                                                                                                                                                                                                                                                                                                                                                                                                                                                                                                                     |
| Date Submitted by the Author:   | 01-Mar-2021                                                                                                                                                                                                                                                                                                                                                                                                                                                                                                                                                                                                                           |
| Complete List of Authors:       | Codsi, Marie-Pierre; University of Montreal Faculty of Medicine, Department of family medicine<br>Karazivan, Philippe; University of Montreal Faculty of Medicine, Department of family medicine; CHUM, Center of Excellence for Partnership with Patients and the Public<br>Rouly, Ghislaine; CHUM, Center of Excellence for Partnership with Patients and the Public<br>Leclaire, Marie; University of Montreal Faculty of Medicine, Department of family medicine<br>Boivin, A; University of Montreal Faculty of Medicine, Department of family medicine; CHUM, Center of Excellence for Partnership with Patients and the Public |
| <b>Primary Subject Heading</b>: | Patient-centred medicine                                                                                                                                                                                                                                                                                                                                                                                                                                                                                                                                                                                                              |
| Secondary Subject Heading:      | Communication, Health policy, Health services research, Qualitative research, Sociology                                                                                                                                                                                                                                                                                                                                                                                                                                                                                                                                               |
| Keywords:                       | Change management < HEALTH SERVICES ADMINISTRATION & MANAGEMENT, Health policy < HEALTH SERVICES ADMINISTRATION & MANAGEMENT, Quality in health care < HEALTH SERVICES ADMINISTRATION & MANAGEMENT, MEDICAL ETHICS, QUALITATIVE RESEARCH                                                                                                                                                                                                                                                                                                                                                                                              |
|                                 |                                                                                                                                                                                                                                                                                                                                                                                                                                                                                                                                                                                                                                       |

SCHOLARONE™  
Manuscripts



I, the Submitting Author has the right to grant and does grant on behalf of all authors of the Work (as defined in the below author licence), an exclusive licence and/or a non-exclusive licence for contributions from authors who are: i) UK Crown employees; ii) where BMJ has agreed a CC-BY licence shall apply, and/or iii) in accordance with the terms applicable for US Federal Government officers or employees acting as part of their official duties; on a worldwide, perpetual, irrevocable, royalty-free basis to BMJ Publishing Group Ltd ("BMJ") its licensees and where the relevant Journal is co-owned by BMJ to the co-owners of the Journal, to publish the Work in this journal and any other BMJ products and to exploit all rights, as set out in our [licence](#).

The Submitting Author accepts and understands that any supply made under these terms is made by BMJ to the Submitting Author unless you are acting as an employee on behalf of your employer or a postgraduate student of an affiliated institution which is paying any applicable article publishing charge ("APC") for Open Access articles. Where the Submitting Author wishes to make the Work available on an Open Access basis (and intends to pay the relevant APC), the terms of reuse of such Open Access shall be governed by a Creative Commons licence – details of these licences and which [Creative Commons](#) licence will apply to this Work are set out in our licence referred to above.

Other than as permitted in any relevant BMJ Author's Self Archiving Policies, I confirm this Work has not been accepted for publication elsewhere, is not being considered for publication elsewhere and does not duplicate material already published. I confirm all authors consent to publication of this Work and authorise the granting of this licence.

# Changing relationships: how does patient involvement transform professional identity?

## An ethnographic study

MP Codsí, P Karazivan, G Rouly, M Leclaire, A Boivin

### Authors:

1. Marie-Pierre Codsí
2. Philippe Karazivan
3. Ghislaine Rouly
4. Marie Leclaire
5. Antoine Boivin

#### 1. Corresponding author: Marie-Pierre Codsí

[Marie-pierre.codsi@umontreal.ca](mailto:Marie-pierre.codsi@umontreal.ca)

University of Montreal Faculty of Medicine, Department of family medicine  
Montreal, C.P. 6128, succursale Centre-ville  
(Québec) H3C 3J7  
Telephone: 1-514 677-1779  
Fax: 514 527-1649

#### 2. Philippe Karazivan

[philippe.karazivan@umontreal.ca](mailto:philippe.karazivan@umontreal.ca)

University of Montreal Faculty of Medicine, Department of family medicine  
Montreal, QC, CAN  
CHUM, Center of Excellence for Partnership with Patients and the Public  
Montreal, QC, CAN

#### 3. Ghislaine Rouly

[Ghislaine.rouly@ceppp.ca](mailto:Ghislaine.rouly@ceppp.ca)

CHUM, Center of Excellence for Partnership with Patients and the Public  
Montreal, QC, CAN

#### 4. Marie Leclaire

[leclaireleclair@gmail.com](mailto:leclaireleclair@gmail.com)

University of Montreal Faculty of Medicine, Department of family medicine  
Montreal, QC, CAN

#### 5. Antoine Boivin

[antoine.boivin@umontreal.ca](mailto:antoine.boivin@umontreal.ca)

University of Montreal Faculty of Medicine, Department of family medicine  
Montreal, QC, CAN  
CHUM, Center of Excellence for Partnership with Patients and the Public  
Montreal, QC, CAN

#### Contributorship statement

This study was conducted in the context of primary author's Master degree (MPC). MPC, PK, GR and AB designed and conducted the study. The data collection was done by MPC. The coding was done by MPC and ML. The data analysis was done by all co-authors (MPC, PK, GR, AB and ML). MPC prepared the manuscript draft with important intellectual input from all the other co-authors. All authors approved the final manuscript and the revised version.

#### Competing interest's declaration:

All authors have completed the ICMJE uniform disclosure form at [www.icmje.org/coi\\_disclosure.pdf](http://www.icmje.org/coi_disclosure.pdf) and declare:

- MPC, GR, PK and AB are part of the CEPPP team (Center of Excellence for Partnership with Patients and the Public ). AB and PK are both Co-directors of the Center of Excellence for Partnership with Patients and the Public in Montreal; AB is the Chairholder of the Canada Research Chair in Patient and Public Partnership ;
- This project received the Patient's Medical Home 60/20 Caring and Compassion Grant (4000\$) and the University of Montreal Interfaculty Operational Committee grant (7500\$).

1  
2  
3  
4  
5 I, Marie-Pierre Codsì, affirms that the researchers work was totally independent from  
6 funders.

7  
8 We declare no other relationships or activities that could appear to have influenced the  
9 submitted work.  
10  
11  
12  
13  
14  
15

## 16 17 **KEY WORDS**

18 **Change management**

19 **Health policy**

20 **Quality in health care**

21 **MEDICAL ETHICS**

22 **QUALITATIVE RESEARCH**

23  
24  
25  
26  
27  
28  
29  
30  
31 **Word count : 3965 words**  
32  
33  
34  
35  
36  
37  
38  
39  
40  
41  
42  
43  
44  
45  
46  
47  
48  
49  
50  
51  
52  
53  
54  
55  
56  
57  
58  
59  
60



## ABSTRACT (250 WORDS)

**Objectives:** To understand identity tensions experienced by health professionals when patient partners join a quality improvement committee.

**Design:** Qualitative ethnographic study based on participatory observation.

**Setting:** The interdisciplinary quality improvement committee of a Canadian urban academic family medicine clinic with little previous experience in patient partnership.

**Participants:** Two patient partners, seven health professionals (two family physicians, two residents, one pharmacist, one nurse clinician, one nurse practitioner) and 3 members of the administrative team.

**Data collection:** Data collection included compiled participatory observations, logbook notes, and semi-structured interviews, collected between the summer of 2017 to the summer 2019.

**Data analysis:** Ghadiri's identity threats theoretical framework was used to analyse qualitative material and to develop conceptualizing categories, using QDA miner software.

**Results:** All professionals with a clinical care role and patient partners (n=9) accepted to participate in the ethnographic study and semi-structured interviews (RR=100%). Transforming the "caregiver-patient" relationship into a "colleague-colleague" relationship generated identity upheavals among professionals. Identity tensions included competing ideals of the "good professional", challenges to the impermeability of the patient and professional categories, the interweaving of symbols associated with one or the other of these identities, and the inner balance between the roles of caregiver and colleague.

**Conclusion:** This research provides a new perspective on understanding how working in partnership with patients transform health professionals' identity. When they are called to work with patients outside of a simple therapeutic relationship, health professionals may feel tensions between their identity as caregivers and their identity as colleague. This allows us to better understand and address practical issues and resistances elicited by the

1  
2  
3 implementation of patient engagement initiative. Partnership with patients imply the  
4 construction of a new relational framework, flexible and dynamic, that takes into account  
5 this co-existence of identities.  
6  
7  
8  
9

## 10 **ARTICLE SUMMARY (STRENGTHS, LIMITATIONS OF THIS STUDY)**

11  
12

- 13  
14 - The methodology used (participatory ethnographic approach) carried out over a  
15 period of more than two years, greatly enriched the understanding of the  
16 phenomenon under study, allowing researchers to have access to informal  
17 discussions that helped uncover identity tensions that were not obvious in  
18 individuals' interviews.  
19
- 20  
21 - The important contribution of this methodology is to import an identity analytical  
22 framework from the business literature to help understand challenges of patient  
23 partnership implementation and to provide an interpretive reading that is  
24 different from the current literature, shedding light on issues frequently  
25 encountered in the field.  
26  
27
- 28  
29 - Because the ethnographic approach was used in a single setting, the analysis  
30 focused more on professionals' individual identity, whereas a multiple case study  
31 in several types of professional environments would have made it possible to  
32 contrast the impact of relational changes on professionals' collective identity.  
33  
34
- 35  
36 - To uncover as many potential issues as possible, we chose to study a team  
37 undergoing its first experience of working in partnership with patients.  
38  
39
- 40  
41 - Working with a team that was relatively new to the subject was potentially more  
42 conducive to exposing the identity shock that resulted when relationships were  
43 transformed from caregiver–patient to colleague–colleague.  
44  
45  
46  
47  
48  
49  
50  
51  
52  
53  
54  
55  
56  
57  
58  
59

# ARTICLE: CHANGING RELATIONSHIPS: HOW DOES PATIENT INVOLVEMENT TRANSFORM PROFESSIONAL IDENTITY?

An ethnographic study

*"It is in these roles that we know each other; it is in these roles that we know ourselves." (1)*

## 1.1 Introduction

Over the past decades there have been growing calls for greater patient and public involvement (PPI) in health care systems around the world (2-5). The PPI movement is today one of the main vectors for creating different initiatives and new models of care (6-11). Despite the problematic context of the COVID 19 pandemic, many new initiatives are now recruiting patients to help rethink policies (12, 13) and medical education (14).

Studies conducted in the wake of PPI initiatives have identified the emergence of several barriers and resistances. Questions have arisen about patients' status within teams (15, 16), the legitimacy of their knowledge and contribution (16-18), the impacts on care quality (3, 19), and the new power relationships being formed within healthcare teams and the health system (20, 21). While some have attempted to understand the issues raised by such experiences (17, 21-23), no study, to our knowledge, has focused on understanding the potential identity tensions between patients and professionals when they are called to interact outside of a simple therapeutic relationship. This is important as many new care models posit that patients should be integrated as partners to contribute to quality improvement, medical research, teaching programs, and health institution governance (8, 19, 22, 24, 25). These initiatives seek to involve them in all stages of decision-making (26). However, professionals and patients' identities are fundamentally based on a caregiving relationship in which professionals are responsible for caring for the patient (27). Therefore, for health professionals, working with patients not as caregiver, but as partner, directly affects the traditional way of doing and viewing

oneself, as health professional (28). This could explain some barriers and resistances experienced on the field.

The present study thus examined identity changes that can arise when patients and health professionals begin working together as partners. Understanding success or failure of organizational change from an identity perspective was mainly used in the business literature (29-33). Uncovering these tensions and how these tensions are experienced on the ground by health professionals could bring a deeper understanding of professional barriers and resistance to PPI (17), and potentially reorient implementation strategies.

## 1.2 Methodology

### Objective

The objective was to understand the identity tensions experienced by health professionals when partnering with patients on a quality improvement committee.

### Design

The study followed a participatory ethnographic design (34-38). In this ethnographic approach, MPC (family medicine resident), PK (family physician) and GR (patient partner) acted as participant observers (39, 40), participating both as members of the quality improvement committee and the research team.

### *Conceptual model*

This study was based on the conceptual model of identity threats developed by Ghadiri (2014). Sacha Ghadiri's work was particularly interesting for our research question as it proposed a model to understand resistance to change resulting specifically from identity tensions.

Identity answers the fundamental question, "who am I?"(41). Identity changes and is transformed in response to several factors: personal characteristics, context, sense of

1  
2  
3 belonging, relationships with others, and how others view us (41). Individuals or social  
4 groups are strongly attached to their identity. Change, however small it may seem, may  
5 threaten the identity of an individual or group (31, 33). If that identity is threatened,  
6 individuals and groups will defend it strongly, whether consciously or not.  
7

8  
9  
10 To facilitate the implementation of change, Ghadiri proposes to undertake an identity  
11 analysis of the issues involved. To do so, he suggests focusing particularly on certain  
12 manifestations of identity that he calls "identity markers": stories, ideals, balances,  
13 categorizations, and symbols. These markers are manifestations of identity that are more  
14 susceptible to tension when change occurs and can generate resistance when they are  
15 shaken up.  
16  
17

18  
19  
20  
21  
22 *Stories* are ways in which the identity of the group or individual is told. Individuals may be  
23 threatened when, for example, a change prevents them from identifying with a story that  
24 was particularly dear to them. *Ideals* are conceptions or aspirations that we wish to  
25 achieve. A change can be experienced as a threat if it poses an obstacle to attaining this  
26 ideal. An individual or group may have several concurrent identities, which coexist in a  
27 sometimes delicate *balance*. A change can be experienced as a threat if it disrupts this  
28 balance. *Categorizations* are labels explicitly or implicitly associated with an individual or  
29 group of individuals. They are manifested, among other things, by the ways in which  
30 individuals are valued or treated according to the category to which they belong. Finally,  
31 *symbols* can be manifested in elements such as attire, access to premises, etc. Identity  
32 can be threatened, "whether by eliminating symbols, disrupting them, eroding them,  
33 replacing them, denying access, or making their expression difficult..." (Ghadiri, 2014, p.  
34 43).  
35  
36  
37  
38  
39  
40  
41  
42  
43  
44  
45  
46  
47

### 48 **Study context**

49  
50 In 2017, a family medicine clinic created a interdisciplinary quality improvement  
51 committee. The clinic was a large academic primary care group practice located in  
52 Montreal, caring for approximately 13,500 patients in collaboration with 80 health  
53 professionals. This clinic has a longstanding tradition of interprofessional care, but no  
54  
55  
56  
57  
58  
59  
60

1  
2  
3 previous experience with patient involvement in quality improvement. The quality  
4 improvement committee functioned from summer 2017 to summer 2019, meeting lasting  
5 two hours approximatively each two months. Its mandate was to optimize the  
6 management of laboratory results at the clinic. Patient partners (PP) involved on the  
7 committee were recruited by the clinic staff during in the fall of 2017 using the Centre of  
8 Excellence for Patient and Public Partnership recruitment methodology (42).  
9  
10  
11  
12  
13  
14  
15

### 16 ***Study participants***

17 The committee consisted of two PP, seven health professionals (two family physicians,  
18 two family medicine residents, one pharmacist, one nurse clinician and one specialized  
19 nurse practitioner), one secretary, one receptionist, and one manager. All members of  
20 the committee were invited to participate in the ethnographic process. Of these  
21 members, only health professionals and PPs were invited to participate in individual  
22 interviews, as our project focused on health professionals' identities with a clinical care  
23 role.  
24  
25  
26  
27  
28  
29  
30  
31

### 32 ***Data collection***

33 Data collection began in 2017, when the committee was officially created, and ended in  
34 winter 2019. It consisted of participatory observations, logbook notes, and semi-  
35 structured interviews. Participatory observations included involvement in the  
36 recruitment of PP and attendance of all committee meetings by MPC, PK and GR.  
37 Participatory observations captured summaries of participants' interventions during the  
38 meetings and the decisions taken by the committee. The participatory observations also  
39 included a summary of all informal discussions among participants and the research team  
40 concerning the implication of a PP in the committee. After each meeting, participants  
41 were met informally over the following days by one of the research team members to  
42 gather feedback on the committee. A summary of these informal "corridor discussions"  
43 was collated.  
44  
45  
46  
47  
48  
49  
50  
51  
52  
53  
54  
55  
56  
57  
58  
59  
60

1  
2  
3 Logbook notes testified to the principal investigator's impressions and feelings as a family  
4 medicine resident throughout the process to enrich the participatory ethnography  
5 process and analysis.  
6  
7

8  
9  
10 Semi-structured interviews, lasting between 90 and 120 min, were conducted by MPC  
11 with professionals and PP around the end of the committee's mandate. The questions in  
12 the interview guide were developed on the basis of Ghadiri's identity markers (ex: - Did  
13 you feel any tensions or conflicts during the process? - What is an ideal PP? – What is the  
14 role of the PP? -What is your role in the committee? Etc.).  
15  
16  
17  
18

### 19 20 21 **Data analysis**

22 Qualitative ethnographic analysis by conceptualizing categories as described by Paillé (43)  
23 was used. Data were compiled using QDA Miner software (version 5.0). Analysis was  
24 begun alongside data collection and used iteratively to enhance the data collection itself.  
25  
26 The data was coded and grouped around major emerging categories by the principal  
27 investigator (MPC) and by ML as a second coder to enhance trustworthiness. All data  
28 collected from participatory observations, logbook notes, and semi-structured interviews  
29 was analyzed using Ghadiri's conceptual framework. The analysis was then entirely  
30 revised by AB and PK. The analysis was then finally revised again by all the research team  
31 (MPC, PK, GR, ML, AB). The socioprofessional background of every researcher was  
32 different (resident in family medicine, psychologist, physicians, and patient). The research  
33 team therefore discussed and compared each other's ideas and interpretations until a  
34 consensus was obtained among all researchers, giving the opportunity to enrich the final  
35 analysis.  
36  
37  
38  
39  
40  
41  
42  
43  
44  
45  
46  
47

### 48 49 **Ethics approval**

50 This project was approved by the ethics committee for research on addiction, social  
51 inequalities, and public health of the *CIUSSS Centre-Sud-de-l'Île-de-Montréal* (DIS-1718-  
52 38). All information was anonymized to protect the identity of the various participants.  
53  
54  
55  
56  
57  
58  
59  
60

### ***Patient and public involvement***

One patient partner (GR) was involved at several stages of the study, at the same level of the others co-researchers (PK, ML and AB). All the project's important decisions were discussed and decided in partnership with the patient. All the co-researchers met on a regular basis for the duration of the project. She was involved in the discussion and writing of the study protocol, the ethics procedures, the data analysis and the present article's manuscript. She contributed to the dissemination plan through being a co-presenter for congress abstract presentations and through the co-authoring of this present article.

### **1.3 Results**

**Participants.** All participants (n=12) agreed to contribute to the participatory ethnographic process. Of these participants, all health professionals and PP (n=9) agreed to participate to individual interviews (RR=100%).

#### ***Identity markers:***

##### ***1. Stories: pioneers threatened in their image of excellence***

In interviews, professionals reported a shared collective story that their clinic had always been known for its strong focus on innovation and quality of care. They all thought that this new experience of partnering with patients was thus in line with the clinic's tradition, being rooted in a collective identity of innovation. All concurred that patients had been integrated as full members of the team during the committee's work. In their initial comments, no conflicts or tensions were reported: a committee in which their professionals' collective identity story of innovators was enhanced and did not seem to have been disrupted in any way (cf Table 1.1.a). However, when probed deeper, particularly in corridor conversations, professionals indicated that the PP's inclusion was not accomplished without fear or apprehension (cf Table 1.1.b).



Table 1. Identity markers : Citations and observations collected

| Identity markers | Citations and observations collected                                                                                                                                                                                                                                                                                                                                                                                                                                                                                                                                                                                                                                                                                                                                                                                                                                                                                                  |
|------------------|---------------------------------------------------------------------------------------------------------------------------------------------------------------------------------------------------------------------------------------------------------------------------------------------------------------------------------------------------------------------------------------------------------------------------------------------------------------------------------------------------------------------------------------------------------------------------------------------------------------------------------------------------------------------------------------------------------------------------------------------------------------------------------------------------------------------------------------------------------------------------------------------------------------------------------------|
| 1.Stories        | <p>a. Citation: “I see everyone is comfortable. I don't feel that... there's any discomfort. I find there's not really any... people aren't holding back, because I know them, and what they're saying, it's what they say in general in their everyday life. It's in the spirit of the times... It wasn't something that... we were against. No one was against that.” – Professional A</p> <p>b. Citation: “Well, I don't think anyone said.... It's not conscious, but to a certain extent, we're afraid of each other.” – Professional M</p> <p>c. Citation: “When we explained our internal problems [in front of patients as partner], it was a little embarrassing, because normally we're supposed to be perfect. That's how it is, in fact, it's like a perfect image. Then, there, we took them behind the scenes.... So then it was a bit embarrassing [to admit] “we're not perfect, you know.” – Professional S</p>      |
| 2.Ideals         | <p>Citation: “This is a departmental priority. Besides that, it's become a priority for the [health authority], it's become a priority for everyone.... They all feel there's a lot of pressure for us to be endorsed by the “patient partner” brand.” – Professional P</p>                                                                                                                                                                                                                                                                                                                                                                                                                                                                                                                                                                                                                                                           |
| 3.Balance        | <p>a. Citation: “We may well be colleagues, but still, they're patients, and I always feel the... urge to provide care, and then we said: ‘we want them to be happy, and do well in there, and feel valued.’” – Professional P</p> <p>b. Citation: “I'd say that, when it's a colleague, I feel more able to confront him.... But when it's a patient... you have to wear... in my thinking, anyway... because he represents the good folks, you have to treat them with kid gloves more often.” – Professional A</p> <p>c. Citation: “(...) At the same time, I see it as a bias, because we're working with two patients who are used to work on committees.” – Professional S</p>                                                                                                                                                                                                                                                  |
| 4.Categorization | <p>a. Citation: “The most important thing for me is to clarify the role, what we're doing around the table, and why we're all here.” – Professional P</p> <p>b. Citation: “Then, because everyone is also a patient... I think that's why... but our patient is more of a patient than we are, his role is to bring that... You know, us, it's not really our role to bring our role as a patient there, either... ” – Professional M</p> <p>c. Observations: certain situations helped increase the PP's legitimacy and clarify the boundaries between PP's and professional's identity:</p> <ol style="list-style-type: none"> <li>I. when PP surprised the team with information or suggestions based on their own care experience that none of the professionals had previously experienced or considered</li> <li>II. when PP contradicted a preconceived notion held by professionals regarding patients' experience</li> </ol> |

|           |                                                                                                                                                                                                                                                                          |
|-----------|--------------------------------------------------------------------------------------------------------------------------------------------------------------------------------------------------------------------------------------------------------------------------|
|           | III. when PP were able to touch team members emotionally with their personal experience of care.                                                                                                                                                                         |
| 5.Symbols | a. Citation: “If I were asked to be a patient partner, I’d like to be paid. Just to say you have a value. It’s not just volunteering. It’s crazy, because we have a system [in which] basically, after all... it seems that your salary is your worth.” – Professional A |

During the field observations, there was a level of anxiety felt by professionals during the first interactions with PP. When certain quality problems were discussed, professionals were particularly attentive to the PP’ reactions, as these discussions were threatening professionals’ collective story of clinical excellence (cf Table 1.1.c). If PP expressed surprise or disappointment, some professionals quickly sought to minimize the impact of the problem or defend the professionals’ reality.

The way in which the professionals spontaneously described their experience was in line with their collective identity story of innovators, working in a pioneer primary care practice. However, corridor discussions revealed a fear that PP’ presence in the “backstage” of professional practice could uncover “imperfections” or “shortcomings” that would undermine professionals’ identity story of excellence.

## 2. *Ideals: Partnership with patients, a new professional ideal*

All professionals concurred that working in partnership is the new “right thing to do” (cf Table 1.2). The professionals therefore worked to ensure the success of the experience to be “good” partners. Professionals mentioned that their relationship with patients should not be hierarchical, but rather built on reciprocity and transparency. Disagreements should be expressed freely and without filters. Our field observations showed that professionals and patients working together felt a need to show stronger connections between each other than what usually occurs in clinical care. For example, the use of informal terms of address (eg. using first names), the sharing of personal

1  
2  
3 stories, and demonstrations of camaraderie between patients and professionals were  
4 methods routinely used to demonstrate that they were not in a caregiver relationship,  
5 and to illustrate that the professionals were successful in embodying this perception of  
6 the new non-hierarchical relationship ideal.  
7  
8  
9

10  
11  
12 Even as professionals strive to attain the ideal of partnership, they also hold another pre-  
13 existing, strong, and deeply entrenched relational ideal: that of the "good caregiver"  
14 looking after patients. Particularly present among the physicians in the committee, this  
15 ideal is embodied in the image of the caring doctor responsible for his or her patients'  
16 well-being. One of the most important objectives for caregivers is to protect the patients'  
17 trust in their professionals. Professionals will oppose anything that could jeopardize the  
18 trust needed for the care relationship. They are afraid to become too familiar or to reveal  
19 flaws or imperfection and believe that, in order to prevent this, they must maintain a  
20 professional "healthy distance". This identity ideal is also reinforced by the code of ethics  
21 to which professionals adhere (44). Our results, summarized in table 2, showed that these  
22 two relational models are based on identity ideals with potentially conflicting  
23 requirements.  
24  
25  
26  
27  
28  
29  
30  
31  
32  
33  
34  
35

36 Table 2. Characteristics of each relational model as perceived by professionals

|                                                    | Caregiver-patient relationship  | Colleague-colleague relationship |
|----------------------------------------------------|---------------------------------|----------------------------------|
| <b>Identity of physician</b>                       | Caregiver                       | Colleague                        |
| <b>Identity of patient</b>                         | Recipient of care               | Colleague                        |
| <b>Relational distance</b>                         | Asymmetrical                    | Symmetrical                      |
| <b>Relational objective (for the professional)</b> | Care                            | Work                             |
| <b>Responsibility</b>                              | Carried mainly by professionals | Shared                           |

37  
38  
39  
40  
41  
42  
43  
44  
45  
46  
47  
48  
49  
50  
51  
52  
53  
54  
55 3. *Balance: Identity tensions between patients as colleagues and people being care for*  
56  
57  
58  
59  
60

1  
2  
3 Data suggests that, in the committee, professionals had two competing identities  
4 (colleague and caregiver), with which they had to deal with simultaneously. Even as the  
5 professionals aimed to consider PP as colleagues, interviews showed they also viewed  
6 them as innocent, vulnerable beings that they felt responsible for (cf Table 1.3.a).  
7  
8  
9

10  
11  
12 After all, professionals consider that the PP who joins the committee is still a patient of  
13 the clinic and, as such, a recipient of care. Consequently, professionals find confronting  
14 the PP very uncomfortable, at least openly (cf Table 1.3.b).  
15  
16  
17

18  
19 If professionals see PP as full members of the team, they will distance them from the  
20 “ordinary” patient and consider that they are all part of the same “professional family”.  
21 However, this was also seen as a negative element by the professionals, since the PP  
22 would no longer be able to adequately embody the identity of an ordinary patient and  
23 would be too far removed from the “real world” (cf Table 1.3.c). This issue was repeatedly  
24 expressed by professionals as a concern regarding the insufficient “representativeness”  
25 of the PP.  
26  
27  
28  
29  
30  
31  
32  
33

34 Corridor conversations and direct observations also revealed another identity tension  
35 among professionals regarding the balance between their identity as colleague and as  
36 caregiver: if a PP asked for a medically-related personal service (e.g. help getting an  
37 appointment with a doctor, medical advice, or a referral), the professional felt  
38 uncomfortable and hesitated about the correct way to respond to this request (as a  
39 doctor? A colleague? A friend?).  
40  
41  
42  
43  
44  
45  
46

#### 47 *4. Categorization: The newcomer, boundaries to be defined*

48

49 The data shows that the boundaries between PP and professional’s identity are  
50 sometimes blurred and that, for professionals, the definition of the PP’s role remains  
51 ambiguous. This complicated the way professionals viewed the PP’s category (cf Table  
52 1.4.a) and, as such, the proper way to work with them. Some professionals noted that if  
53  
54  
55  
56  
57  
58  
59  
60

1  
2  
3 the discussion touched them personally, they tended to recall their own experiences as a  
4 patient. Thus, they considered that the “patient” label could be applied to them as well.  
5 Professionals therefore expected PP to bring to the table knowledge that was different  
6 from that of other team members (cf Table 1.4.b).  
7  
8  
9

10  
11  
12 Moreover, we observed that certain situations helped increase the PP’s legitimacy and  
13 clarify the boundaries between PP’s and professional’s identity (cf Table 1.4.c). Such cases  
14 help the professional establish an identity boundary that categorizes the PP as  
15 “colleagues with a different expertise”.  
16  
17  
18

19  
20  
21 *Symbols: Remuneration, as a symbolic identity issue*  
22

23 Several identity symbols were challenged by PP involvement in the committee. Notably,  
24 PP’s remuneration raised not only financial questions, but also questions around roles  
25 and status. Beyond its practical implications (Should they be paid? How much? Who  
26 should pay?), remuneration debates crystalized identity questions (eg. Did a salary imply  
27 employee status? How does it distinguish patient partners with professionals’ roles?).  
28 Most of the professionals concluded that, as they all shared the same identity within the  
29 committee, they should all be paid. However, when questioned on the salary PPs should  
30 obtain, professionals showed discomfort. Their opinions were divided because different  
31 professions were paid a different hourly rate for their participation. Some of them  
32 expressed their beliefs that PPs should not be paid more than the lowest paid participant  
33 around the table. At the same time, they expressed concern about the fact that PPs  
34 should not be the lowest paid participant since they felt someone’s value was somewhat  
35 reflected in their salary (cf Table 1.5.a.).  
36  
37  
38  
39  
40  
41  
42  
43  
44  
45  
46

47  
48 Other symbols have raised questions rooted in the professionals’ perception of the PP’s  
49 dual identity as colleagues and users of care. For example, granting PP clinic access card  
50 and the nature of their confidentiality obligations were the subject of several discussions  
51 in the committee.  
52  
53  
54  
55  
56  
57  
58  
59  
60

## 1.4 Discussion

This study reports and interprets how working with patients is a new way of entering into relationships and how this transforms the identity of professionals. Even if, in this study, all participants agreed that the experience was a success in terms of partnership with patients, transforming the “caregiver–patient” relationship into a “colleague-colleague” relationship generated identity upheavals among the professionals, relating to the “good professional” ideal, the impermeability of the patient and professional categories, the interweaving of the symbols associated with these identities, and the inner balance between the roles of carer and colleague. Professionals struggle with this dual identity and transfer this ambiguity on their perception of the patient’s identity as a “real patient” or not. This could explain some professionals’ perception of PP identity mentioned in the literature as ambiguous and poorly defined (15, 45).

Given the coexistence of multiple identities, striking a balance between them brings many challenges for the professional. While balancing identities is complex, the professional cannot relinquish either of his identity ideals without consequence. On one hand, if the professional perceives the patient as sufficiently distanced from this image of care receiver, he will feel comfortable to work in a colleague-colleague relationship. The energy will be focused more on productivity than on creating a positive relational experience. On the other hand, if the professional sees the PP as too far removed from what is considered an “ordinary patient” identity, the professional will consider the person’s presence to be less legitimate, even irrelevant. This is mainly because the professional grants the person legitimacy on the basis of a patient identity, while giving the person access to real relational reciprocity on the basis of a co-worker identity.

The important contribution of this study is to import an identity analytical framework to help understand challenges of PP implementation. This provide an interpretive reading that is original and different from the current literature, shedding light on certain issues

1  
2  
3 frequently encountered in the field (3, 15-18, 21, 22, 45-48) (e.g professionals' resistance  
4 to working with patients, merely symbolic involvement of patients, remuneration,  
5 patients' status and unequal power relationships between professionals and PP,  
6 professionals' concerns toward patient "representativeness") that could be indicative of  
7 underlying identity tensions between patients and health professionals.  
8  
9  
10  
11  
12  
13  
14  
15

### 16 **Strengths, limitations, and future research**

17  
18  
19 The methodology used (participatory ethnographic approach) carried out over a period  
20 of more than two years, greatly enriched the understanding of the phenomenon under  
21 study, allowing researchers to have access to informal corridor discussions that helped  
22 uncover identity tensions that were not obvious in formal interviews. This methodology  
23 follows in the footsteps of recent literature striving for the study of complexity in health  
24 services (49-52).  
25  
26  
27  
28  
29  
30

31 Observations were conducted by multiple observers (two family doctors and one patient)  
32 on the same meetings which is, in our opinion, a strength for the analysis process.  
33 However, because the ethnographic approach was used in a single setting, the analysis  
34 focused more on one primary care team identity, whereas a multiple case study in several  
35 types of professional environments would have made it possible to contrast the impact  
36 of relational changes on professionals' collective identity. Also, to uncover as many  
37 potential issues as possible, we chose to study a team undergoing its first experience of  
38 working in partnership. It would be interesting to see whether similar results would  
39 emerge with a more experienced team, in which the balance and tensions between  
40 different identities might have already stabilized to some extent over time. On the other  
41 hand, working with a team that was relatively new to the subject was potentially more  
42 conducive to exposing the identity shock that resulted when relationships were  
43 transformed from caregiver-patient to colleague-colleague. Future research is also  
44 needed to better understand identity issues experienced by patient partners.  
45  
46  
47  
48  
49  
50  
51  
52  
53  
54  
55  
56  
57  
58  
59  
60

1  
2  
3  
4  
5 Finally, some might conclude that this research calls for ways to help professionals  
6 minimize these identity tensions. However, it is important to consider whether, in  
7 essence, creating identity tensions is not the very strength of working in partnership with  
8 patients. This would perhaps need to be questioned yet again if ambiguity and relational  
9 discomfort were to disappear and be replaced by a relationship that is too “complacent”.

### 16 1.5 Conclusion

19 This research provides a new perspective on understanding how working in partnership  
20 with patients transform health professionals’ identity. When they are called to work  
21 with patients outside of a simple therapeutic relationship, health professionals may feel  
22 tensions between their identity as caregivers and their identity as colleague. This allows  
23 us to better understand and address practical issues and resistances elicited by the  
24 arrival of different patient engagement initiatives. Partnership with patients imply the  
25 construction of a new relational framework, flexible and dynamic, that takes into  
26 account this co-existence of identities.  
27  
28  
29  
30  
31  
32  
33  
34  
35  
36  
37  
38  
39  
40  
41  
42  
43  
44  
45  
46  
47  
48  
49  
50  
51  
52  
53  
54  
55  
56  
57  
58  
59  
60



## Copyright

I, Marie-Pierre Codsí, has the right to grant on behalf of all authors and does grant on behalf of all authors, an exclusive licence on a worldwide basis to the BMJ Publishing Group Ltd to permit this article (if accepted) to be published in BMJ editions and any other BMJ PGL products and sublicences such use and exploit all subsidiary rights, as set out in our licence.

**Guarantor:** Marie-Pierre Codsí ([marie-pierre.codsi@umontreal.ca](mailto:marie-pierre.codsi@umontreal.ca))

**Transparency declaration:** I, Marie-Pierre Codsí, affirms that this manuscript is an honest, accurate, and transparent account of the study being reported; that no important aspects of the study have been omitted; and that any discrepancies from the study as planned have been explained.

**Ethics approval:** The project was approved by the ethics committee for research on addiction, social inequalities, and public health of the *CIUSSS Centre-Sud-de-l'Île-de-Montréal* (DIS-1718-38).

**Funding:** This project received the Patient's Medical Home 60/20 Caring and Compassion Grant (4000\$) and the University of Montreal Interfaculty Operational Committee grant (7500\$).

*Details of the role of the study sponsors:* I, Marie-Pierre Codsí, affirms that the researchers work was totally independent from funders.

**Patient and public involvement:** One patient partner (GR) was involved at several stages of the study, at the same level of the others co-researchers (PK, ML and AB). All the project's important decisions were discussed and decided in partnership with the patient. All the co-researchers met on a regular basis for the duration of the project. The patient

1  
2  
3 partner was involved in the discussion and creation of the study protocol, the ethics  
4 procedures, the data analysis and the present article's manuscript. She contributed to the  
5 dissemination plan through being a co-presenter for congress abstract presentations and  
6 through the co-authoring of this present manuscript.  
7  
8  
9

10  
11  
12 **Dissemination declaration:** We plan to disseminate the results to study participants  
13 and to patient organisations.  
14  
15

16  
17  
18 **Data sharing:** Data are available upon reasonable request (Individual participant data  
19 that  
20 underlie the results reported in this article, after deidentification, study protocol,  
21 informed Consent Form, Analytic Code).  
22  
23  
24

25  
26  
27  
28 **\*\*\*This article follows the guidelines by the European Medical Writers' Association on**  
29 **the role of professional medical writers. \*\*\***  
30  
31  
32  
33  
34  
35  
36  
37  
38  
39  
40  
41  
42  
43  
44  
45  
46  
47  
48  
49  
50  
51  
52  
53  
54  
55  
56  
57  
58  
59  
60

1  
2  
3  
4  
5  
6  
7  
8  
9  
10  
11  
12  
13  
14  
15  
16  
17  
18  
19  
20  
21  
22  
23  
24  
25  
26  
27  
28  
29  
30  
31  
32  
33  
34  
35  
36  
37  
38  
39  
40  
41  
42  
43  
44  
45  
46  
47  
48  
49  
50  
51  
52  
53  
54  
55  
56  
57  
58  
59  
60

For peer review only

## Bibliography

1. Park RE. Race and culture: Free Press; 1950. 403 p.
2. Fleurence R, Selby JV, Odom-Walker K, Hunt G, Meltzer D, Slutsky JR, et al. How the Patient-Centered Outcomes Research Institute is engaging patients and others in shaping its research agenda. *Health Affairs*. 2013;32(2):393-400.
3. Bombard Y, Baker GR, Orlando E, Fancott C, Bhatia P, Casalino S, et al. Engaging patients to improve quality of care: a systematic review. *Implementation Science*. 2018;13(1):98.
4. Russell J, Greenhalgh T, Taylor M. Patient and public involvement in NIHR research 2006-2019: policy intentions, progress and themes. 2019.
5. Clavel N, Pomey M-P, Ghadiri DPS. Partnering with patients in quality improvement: towards renewed practices for healthcare organization managers? *BMC health services research*. 2019;19(1):815.
6. Coulter A. Paternalism or partnership?: Patients have grown up—and there's no going back. British Medical Journal Publishing Group; 1999.
7. Richards T. Tessa Richards: Transforming healthcare—one flower at a time. *Thebmjopinion*. BMJ2019.
8. Karazivan P, Dumez V, Flora L, Pomey MP, Del Grande C, Ghadiri DP, et al. The patient-as-partner approach in health care: a conceptual framework for a necessary transition. *Acad Med*. 2015;90(4):437-41.
9. Barry MJ, Edgman-Levitan S. Shared decision making—the pinnacle of patient-centered care. *New England Journal of Medicine*. 2012;366(9):780-1.
10. Bodenheimer T, Lorig K, Holman H, Grumbach K. Patient self-management of chronic disease in primary care. *Jama*. 2002;288(19):2469-75.
11. Tattersall RL. The expert patient: a new approach to chronic disease management for the twenty-first century. *Clin Med (Lond)*. 2002;2(3):227-9.
12. Boivin A, Penafiel M, Rouly G, Lahaie V, Codsí M-P, Isabel M, et al. *TheBMJopinion* [Internet]. BMJ, editor2020. [cited 2020]. Available from: <https://blogs.bmj.com/bmj/2020/04/07/covid-19-a-pivotal-moment-in-community-care/>
13. Quirion R. Création du Réseau québécois COVID. Gouvernement du Québec; 2020.
14. Jackson M, Descôteaux A, Nicaise L, Flora L, Berkesse A, Codsí M-P, et al. Former en ligne au recrutement de patients partenaires : l'apport des formations par concordance. *Pédagogie Médicale*. 2020.
15. Barber R, Boote JD, Parry GD, Cooper CL, Yeeles P, Cook S. Can the impact of public involvement on research be evaluated? A mixed methods study. *Health Expect*. 2012;15(3):229-41.
16. Lough S. Need to define patient engagement in research. *Can Med Assoc*; 2015.
17. Staniszewska S, Mockford C, Gibson A, Herron-Marx S, Putz R. Moving Forward: Understanding the Negative Experiences and Impacts of Patient and Public Involvement in Health Service Planning, Development, and Evaluation.

- Critical perspectives on user involvement edn Edited by Barnes M, Cotterell P  
Bristol: Policy. 2012:129-41.
18. Domecq JP, Prutsky G, Elraiyah T, Wang Z, Nabhan M, Shippee N, et al. Patient engagement in research: a systematic review. *BMC Health Services Research*. 2014;14(1):89.
  19. Aubin D, Hebert M, Eurich D. The importance of measuring the impact of patient-oriented research. *CMAJ: Canadian Medical Association journal= journal de l'Association medicale canadienne*. 2019;191(31):E860.
  20. Saraga M. Transparence, transfert et patient partenaire. *Psycho-Oncologie*. 2018;12(1):24-8.
  21. O'Shea A, Boaz AL, Chambers M. A hierarchy of power: the place of patient and public involvement in healthcare service development. *Frontiers in Sociology*. 2019;4.
  22. Montreuil M, Martineau JT, Racine E. Exploring Ethical Issues Related to Patient Engagement in Healthcare: Patient, Clinician and Researcher's Perspectives. *Journal of bioethical inquiry*. 2019:1-12.
  23. Boivin A, Lehoux P, Burgers J, Grol R. What are the key ingredients for effective public involvement in health care improvement and policy decisions? A randomized trial process evaluation. *Milbank Quarterly*. 2014;92(2):319-50.
  24. Boivin A, Richards T, Forsythe L, Grégoire A, L'Espérance A, Abelson J, et al. Evaluating patient and public involvement in research. *British Medical Journal Publishing Group*; 2018.
  25. Aldcroft A. New requirements for patient and public involvement statements in BMJ Open. *BMJ Open*. 2018.
  26. Carman KL, Dardess P, Maurer M, Sofaer S, Adams K, Bechtel C, et al. Patient and family engagement: a framework for understanding the elements and developing interventions and policies. *Health Aff (Millwood)*. 2013;32(2):223-31.
  27. Parsons T. The sick role and the role of the physician reconsidered. *Milbank Mem Fund Q Health Soc*. 1975;53(3):257-78.
  28. Richards T. Patient leaders—healthcare's untapped workforce. *TheBMJopinion* [Internet]. 2017. Available from: <https://blogs.bmj.com/bmj/2017/12/22/tessa-richards-patient-leaders-healthcares-untapped-workforce/>.
  29. Conroy SA, O'Leary-Kelly AM. Letting go and moving on: Work-related identity loss and recovery. *Academy of Management Review*. 2014;39(1):67-87.
  30. Ghadiri DP. Quand le changement menace l'identité. *Gestion*. 2014;39(1):38-47.
  31. Branscombe NR, Ellemers N, Spears R, Doosje B. The context and content of social identity threat. *Social identity: Context, commitment, content*. 1999:35-58.
  32. Fiol CM, Pratt MG, O'Connor EJ. Managing intractable identity conflicts. *Academy of Management Review*. 2009;34(1):32-55.
  33. Ford JD, Ford LW. Decoding resistance to change. *Harvard business review*. 2009;87(4):99-103.
  34. Blomberg J, Karasti H. Positioning ethnography within participatory design. *Routledge international handbook of participatory design*. 2012:86-116.

- 1  
2  
3 35. Diaz F. L'observation participante comme outil de compréhension du champ  
4 de la sécurité. Récit d'un apprentissage de l'approche ethnographique pour tenter  
5 de rendre compte de la complexité du social. *Champ pénal/Penal field*. 2005;2.  
6 36. Gérin-Lajoie D. L'utilisation de l'ethnographie dans l'analyse du rapport à  
7 l'identité. *Éducation et sociétés*. 2006(1):73-87.  
8 37. Lapassade G. L'observation participante. *Revista Europea de Etnografia da*  
9 *Educação*. 2001;1(1):9-26.  
10 38. Mehan H, Wood H. The morality of ethnomethodology. *Theory and Society*.  
11 1975;2(1):509-30.  
12 39. Gold RL. Roles in sociological field observations. *Soc F*. 1957;36:217.  
13 40. Kawulich BB, editor Participant observation as a data collection method.  
14 *Forum qualitative sozialforschung/forum: Qualitative social research*; 2005.  
15 41. Goffman E, Kihm A. *La mise en scène de la vie quotidienne: Minuit Paris*;  
16 1973.  
17 42. DCP. Guide de pratique: Recrutement des patients partenaires. Faculté de  
18 médecine: Université de Montréal; 2015.  
19 43. Paillé P, Mucchielli A. *L'analyse qualitative en sciences humaines et sociales-*  
20 *4e éd: Armand Colin*; 2016.  
21 44. Collège des médecins du Québec. Code of ethics of physicians 2019 [Available  
22 from: <http://www.cmq.org/page/en/code-de-deontologie-des-medecins.aspx>.  
23 45. Brett J, Staniszewska S, Mockford C, Seers K, Herron-Marx S, Bayliss H. The  
24 PIRICOM Study: A systematic review of the conceptualisation, measurement, impact  
25 and outcomes of patients and public involvement in health and social care research.  
26 2010.  
27 46. Maguire K, Britten N. "How can anybody be representative for those kind of  
28 people?" Forms of patient representation in health research, and why it is always  
29 contestable. *Social Science & Medicine*. 2017;183:62-9.  
30 47. Renedo A, Komporozos-Athanasίου A, Marston C. Experience as evidence:  
31 The dialogic construction of health professional knowledge through patient  
32 involvement. *Sociology*. 2018;52(4):778-95.  
33 48. Pomey MP, Ghadiri DP, Karazivan P, Fernandez N, Clavel N. Patients as  
34 partners: a qualitative study of patients' engagement in their health care. *PLoS One*.  
35 2015;10(4):e0122499.  
36 49. Greenhalgh T, Papoutsis C. Studying complexity in health services research:  
37 desperately seeking an overdue paradigm shift. *BioMed Central*; 2018.  
38 50. Braithwaite J, Churrua K, Long JC, Ellis LA, Herkes J. When complexity  
39 science meets implementation science: a theoretical and empirical analysis of  
40 systems change. *BMC medicine*. 2018;16(1):63.  
41 51. Plsek PE, Wilson T. Complexity, leadership, and management in healthcare  
42 organisations. *Bmj*. 2001;323(7315):746-9.  
43 52. Craig P, Dieppe P, Macintyre S, Michie S, Nazareth I, Petticrew M. Developing  
44 and evaluating complex interventions: the new Medical Research Council guidance.  
45 *Bmj*. 2008;337:a1655.  
46  
47  
48  
49  
50  
51  
52  
53  
54  
55  
56  
57  
58  
59  
60

1  
2  
3 **SRQR Guidelines fo Qualitative Research \_ BMJOpen**

|                                                                                            |            |
|--------------------------------------------------------------------------------------------|------------|
| 4 <b>Title and abstract</b>                                                                |            |
| 5 Title                                                                                    | p.1        |
| 6 Abstract                                                                                 | p.4        |
| 7 <b>Introduction</b>                                                                      |            |
| 8 problem formulation                                                                      | p.6 (L19)  |
| 9 purpose                                                                                  | p.7 (L3)   |
| 10 <b>Methods</b>                                                                          |            |
| 11 Qualitative approach                                                                    | p.7 (L17)  |
| 12 researcher characteristics and reflexivity                                              | p.7 (L17)  |
| 13 context                                                                                 | p.8 (L25)  |
| 14 sampling strategy                                                                       | p.9 (L8)   |
| 15 ethical issu                                                                            | p.10 (L25) |
| 16 data collection                                                                         | p.9 (L17)  |
| 17 units of study                                                                          | p.9 (L19)  |
| 18 data processing                                                                         | p.10 (L12) |
| 19 data analysis                                                                           | p.10 (L17) |
| 20 techniques to enhance trusworthiness                                                    | p.10 (L15) |
| 21 <b>Results and findings</b>                                                             |            |
| 22 synthesis and interpretation                                                            | p.17 (L2)  |
| 23 links to empirical data                                                                 | p.17 (L27) |
| 24 <b>Discussion</b>                                                                       |            |
| 25 integration to prior work, implications, transferability, adn contribution to the field | p.17 (L24) |
| 26 limitations                                                                             | p.18 (L14) |
| 27 <b>Others</b>                                                                           |            |
| 28 conflicts of interest                                                                   | p.2 (L23)  |
| 29 funding                                                                                 | p.20 (23)  |
| 30                                                                                         |            |
| 31                                                                                         |            |
| 32                                                                                         |            |
| 33                                                                                         |            |
| 34                                                                                         |            |
| 35                                                                                         |            |
| 36                                                                                         |            |
| 37                                                                                         |            |
| 38                                                                                         |            |
| 39                                                                                         |            |
| 40                                                                                         |            |
| 41                                                                                         |            |
| 42                                                                                         |            |
| 43                                                                                         |            |
| 44                                                                                         |            |
| 45                                                                                         |            |
| 46                                                                                         |            |

# BMJ Open

## Changing relationships: How does patient involvement transform professional identity? An ethnographic study

|                                 |                                                                                                                                                                                                                                                                                                                                                                                                                                                                                                                                                                                                                                       |
|---------------------------------|---------------------------------------------------------------------------------------------------------------------------------------------------------------------------------------------------------------------------------------------------------------------------------------------------------------------------------------------------------------------------------------------------------------------------------------------------------------------------------------------------------------------------------------------------------------------------------------------------------------------------------------|
| Journal:                        | <i>BMJ Open</i>                                                                                                                                                                                                                                                                                                                                                                                                                                                                                                                                                                                                                       |
| Manuscript ID                   | bmjopen-2020-045520.R2                                                                                                                                                                                                                                                                                                                                                                                                                                                                                                                                                                                                                |
| Article Type:                   | Original research                                                                                                                                                                                                                                                                                                                                                                                                                                                                                                                                                                                                                     |
| Date Submitted by the Author:   | 23-Apr-2021                                                                                                                                                                                                                                                                                                                                                                                                                                                                                                                                                                                                                           |
| Complete List of Authors:       | Codsi, Marie-Pierre; University of Montreal Faculty of Medicine, Department of family medicine<br>Karazivan, Philippe; University of Montreal Faculty of Medicine, Department of family medicine; CHUM, Center of Excellence for Partnership with Patients and the Public<br>Rouly, Ghislaine; CHUM, Center of Excellence for Partnership with Patients and the Public<br>Leclaire, Marie; University of Montreal Faculty of Medicine, Department of family medicine<br>Boivin, A; University of Montreal Faculty of Medicine, Department of family medicine; CHUM, Center of Excellence for Partnership with Patients and the Public |
| <b>Primary Subject Heading</b>: | Patient-centred medicine                                                                                                                                                                                                                                                                                                                                                                                                                                                                                                                                                                                                              |
| Secondary Subject Heading:      | Communication, Health policy, Health services research, Qualitative research, Sociology                                                                                                                                                                                                                                                                                                                                                                                                                                                                                                                                               |
| Keywords:                       | Change management < HEALTH SERVICES ADMINISTRATION & MANAGEMENT, Health policy < HEALTH SERVICES ADMINISTRATION & MANAGEMENT, Quality in health care < HEALTH SERVICES ADMINISTRATION & MANAGEMENT, MEDICAL ETHICS, QUALITATIVE RESEARCH                                                                                                                                                                                                                                                                                                                                                                                              |
|                                 |                                                                                                                                                                                                                                                                                                                                                                                                                                                                                                                                                                                                                                       |

SCHOLARONE™  
Manuscripts





I, the Submitting Author has the right to grant and does grant on behalf of all authors of the Work (as defined in the below author licence), an exclusive licence and/or a non-exclusive licence for contributions from authors who are: i) UK Crown employees; ii) where BMJ has agreed a CC-BY licence shall apply, and/or iii) in accordance with the terms applicable for US Federal Government officers or employees acting as part of their official duties; on a worldwide, perpetual, irrevocable, royalty-free basis to BMJ Publishing Group Ltd ("BMJ") its licensees and where the relevant Journal is co-owned by BMJ to the co-owners of the Journal, to publish the Work in this journal and any other BMJ products and to exploit all rights, as set out in our [licence](#).

The Submitting Author accepts and understands that any supply made under these terms is made by BMJ to the Submitting Author unless you are acting as an employee on behalf of your employer or a postgraduate student of an affiliated institution which is paying any applicable article publishing charge ("APC") for Open Access articles. Where the Submitting Author wishes to make the Work available on an Open Access basis (and intends to pay the relevant APC), the terms of reuse of such Open Access shall be governed by a Creative Commons licence – details of these licences and which [Creative Commons](#) licence will apply to this Work are set out in our licence referred to above.

Other than as permitted in any relevant BMJ Author's Self Archiving Policies, I confirm this Work has not been accepted for publication elsewhere, is not being considered for publication elsewhere and does not duplicate material already published. I confirm all authors consent to publication of this Work and authorise the granting of this licence.

# Changing relationships: how does patient involvement transform professional identity?

## An ethnographic study

MP Codsí, P Karazivan, G Rouly, M Leclaire, A Boivin

### Authors:

1. Marie-Pierre Codsí
2. Philippe Karazivan
3. Ghislaine Rouly
4. Marie Leclaire
5. Antoine Boivin

#### 1. Corresponding author: Marie-Pierre Codsí

[Marie-pierre.codsi@umontreal.ca](mailto:Marie-pierre.codsi@umontreal.ca)

University of Montreal Faculty of Medicine, Department of family medicine  
Montreal, C.P. 6128, succursale Centre-ville  
(Québec) H3C 3J7  
Telephone: 1-514 677-1779  
Fax: 514 527-1649

#### 2. Philippe Karazivan

[philippe.karazivan@umontreal.ca](mailto:philippe.karazivan@umontreal.ca)

University of Montreal Faculty of Medicine, Department of family medicine  
Montreal, QC, CAN  
CHUM, Center of Excellence for Partnership with Patients and the Public  
Montreal, QC, CAN

#### 3. Ghislaine Rouly

[Ghislaine.rouly@ceppp.ca](mailto:Ghislaine.rouly@ceppp.ca)

CHUM, Center of Excellence for Partnership with Patients and the Public  
Montreal, QC, CAN

1  
2  
3 **4. Marie Leclaire**  
4

5 [leclaireleclain@gmail.com](mailto:leclaireleclain@gmail.com)  
6

7 University of Montreal Faculty of Medicine, Department of family medicine  
8 Montreal, QC, CAN  
9

10 **5. Antoine Boivin**  
11

12 [antoine.boivin@umontreal.ca](mailto:antoine.boivin@umontreal.ca)  
13

14 University of Montreal Faculty of Medicine, Department of family medicine  
15 Montreal, QC, CAN  
16 CHUM, Center of Excellence for Partnership with Patients and the Public  
17 Montreal, QC, CAN  
18  
19  
20  
21  
22  
23

24 **KEY WORDS**  
25

26 **Change management**  
27

28 **Health policy**  
29

30 **Quality in health care**  
31

32 **MEDICAL ETHICS**  
33

34 **QUALITATIVE RESEARCH**  
35  
36  
37

38 **Word count : 3708 words**  
39  
40  
41  
42  
43  
44  
45  
46  
47  
48  
49  
50  
51  
52  
53  
54  
55  
56  
57  
58  
59  
60

## ABSTRACT (250 WORDS)

**Objectives:** To understand identity tensions experienced by health professionals when patient partners join a quality improvement committee.

**Design:** Qualitative ethnographic study based on participatory observation.

**Setting:** The interdisciplinary quality improvement committee of a Canadian urban academic family medicine clinic with little previous experience in patient partnership.

**Participants:** Two patient partners, seven health professionals (two family physicians, two residents, one pharmacist, one nurse clinician, one nurse practitioner) and 3 members of the administrative team.

**Data collection:** Data collection included compiled participatory observations, logbook notes, and semi-structured interviews, collected between the summer of 2017 to the summer 2019.

**Data analysis:** Ghadiri's identity threats theoretical framework was used to analyse qualitative material and to develop conceptualizing categories, using QDA miner software.

**Results:** All professionals with a clinical care role and patient partners (n=9) accepted to participate in the ethnographic study and semi-structured interviews (RR=100%). Transforming the "caregiver-patient" relationship into a "colleague-colleague" relationship generated identity upheavals among professionals. Identity tensions included competing ideals of the "good professional", challenges to the impermeability of the patient and professional categories, the interweaving of symbols associated with one or the other of these identities, and the inner balance between the roles of caregiver and colleague.

**Conclusion:** This research provides a new perspective on understanding how working in partnership with patients transform health professionals' identity. When they are called to work with patients outside of a simple therapeutic relationship, health professionals may feel tensions between their identity as caregivers and their identity as colleague. This allows us to better understand some underlying tensions elicited by the arrival of

1  
2  
3 different patient engagement initiatives (e.g professionals' resistances to working with  
4 patients, patients' status and remuneration, professionals' concerns toward patient  
5 "representativeness"). Partnership with patients imply the construction of a new  
6 relational framework, flexible and dynamic, that takes into account this co-existence of  
7 identities.  
8  
9  
10  
11  
12  
13  
14  
15  
16  
17  
18  
19  
20  
21  
22  
23  
24  
25  
26  
27  
28  
29  
30  
31  
32  
33  
34  
35  
36  
37  
38  
39  
40  
41  
42  
43  
44  
45  
46  
47  
48  
49  
50  
51  
52  
53  
54  
55  
56  
57  
58  
59  
60

## ARTICLE SUMMARY (STRENGTHS, LIMITATIONS OF THIS STUDY)

- The methodology used (participatory ethnographic approach) carried out over a period of more than two years, enriched the understanding of the phenomenon under study, allowing researchers to have access to informal discussions that helped uncover identity tensions that were not obvious in individuals' interviews.
- The important contribution of this methodology is to import an identity analytical framework from the business literature to help understand challenges of patient partnership implementation and to provide an interpretive reading that is different from the current literature, shedding light on issues frequently encountered in the field (e.g professionals' resistances to working with patients, patients' status and remuneration, professionals' concerns toward patient "representativeness").
- Because the ethnographic approach was used in a single setting, the analysis focused more on professionals' individual identity, whereas a multiple case study in several types of professional environments would have made it possible to contrast the impact of relational changes on professionals' collective identity.
- To uncover as many potential issues as possible, we chose to study a team undergoing its first experience of working in partnership with patients.
- Working with a team that was relatively new to the subject was potentially more conducive to exposing the identity shock that resulted when relationships were transformed from caregiver-patient to colleague-colleague.

# ARTICLE: CHANGING RELATIONSHIPS: HOW DOES PATIENT INVOLVEMENT TRANSFORM PROFESSIONAL IDENTITY?

An ethnographic study

*"It is in these roles that we know each other; it is in these roles that we know ourselves."* (1)

## 1. Introduction

Over the past decades there have been growing calls for greater patient and public involvement (PPI) in health care systems around the world (2-5). The PPI movement is today one of the main vectors for creating different initiatives and new models of care (6-11). Despite the problematic context of the COVID 19 pandemic, many new initiatives are now recruiting patients to help rethink policies (12, 13) and medical education (14).

Studies conducted in the wake of PPI initiatives have identified the emergence of several barriers and resistances. Questions have arisen about patients' status within teams (15, 16), the legitimacy of their knowledge and contribution (16-18), the impacts on care quality (3, 19), and the new power relationships being formed within healthcare teams and the health system (20, 21). While some have attempted to understand the issues raised by such experiences (17, 21-23), no study, to our knowledge, has focused on understanding the potential identity tensions for professionals when they are called to interact with patients outside of a simple therapeutic relationship. This is important as many new care models posit that patients should be integrated as partners to contribute to quality improvement, medical research, teaching programs, and health institution governance (8, 19, 22, 24, 25). These initiatives seek to involve them in all stages of decision-making (26). However, professionals and patients' identities are historically based on a caregiving relationship in which professionals are responsible for caring for the patient (27). Therefore, for health professionals, working with patients not as caregiver, but as partner, directly affects the traditional way of doing and viewing oneself,

1  
2  
3 as health professional (28). This could explain some barriers and resistances experienced  
4 on the field.  
5

6  
7 The present study thus examined identity changes that can arise when patients and  
8 health professionals begin working together as partners. Understanding success or failure  
9 of organizational change from an identity perspective has so far mainly been used in the  
10 business literature (29-33). Uncovering these tensions and how these tensions are  
11 experienced by health professionals could bring a deeper understanding of professional  
12 barriers and resistance to PPI (17), and potentially reorient implementation strategies.  
13  
14  
15  
16  
17  
18  
19  
20  
21

## 22 **2. Methodology**

### 23 **Objective**

24  
25  
26 The objective was to understand the identity tensions experienced by health  
27 professionals when partnering with patients on a quality improvement committee.  
28  
29  
30

### 31 **Design**

32  
33 The study followed a participatory ethnographic design (34-38). In this ethnographic  
34 approach, MPC (family medicine resident), PK (family physician) and GR (patient partner)  
35 acted as participant observers (39, 40), participating both as members of the quality  
36 improvement committee and members of the research team. Two additional  
37 investigators (AB and ML) were non-participants.  
38  
39  
40  
41  
42  
43  
44  
45

### 46 ***Conceptual model***

47  
48 This study was based on the conceptual model of identity threats developed by Ghadiri  
49 (2014). Sacha Ghadiri's work was particularly interesting for our research question as it  
50 proposed a model to understand resistance to change resulting specifically from identity  
51 tensions.  
52  
53  
54  
55  
56  
57  
58  
59  
60



1  
2  
3 Identity answers the fundamental question, "who am I?"(41). Identity changes and is  
4 transformed in response to several factors: personal characteristics, context, sense of  
5 belonging, relationships with others, and how others view us (41). Individuals or social  
6 groups are strongly attached to their identity. Change, however small it may seem, may  
7 threaten the identity of an individual or group (31, 33). If that identity is threatened,  
8 individuals and groups will defend it strongly, whether consciously or not.

9  
10 To facilitate the implementation of any change in an organization, Ghadiri proposes to  
11 undertake an identity analysis of the issues involved. To do so, he suggests focusing  
12 particularly on certain manifestations of identity that he calls "identity markers": stories,  
13 ideals, balances, categorizations, and symbols. These markers are manifestations of  
14 identity that are more susceptible to tension when change occurs and can generate  
15 resistance when they are shaken up.

16  
17 *Stories* are ways in which the identity of the group or individual is told. Individuals may be  
18 threatened when, for example, a change prevents them from identifying with a story that  
19 was particularly dear to them. *Ideals* are conceptions or aspirations that we wish to  
20 achieve. A change can be experienced as a threat if it poses an obstacle to attaining this  
21 ideal. An individual or group may have several concurrent identities, which coexist in a  
22 sometimes delicate *balance*. A change can be experienced as a threat if it disrupts this  
23 balance. *Categorizations* are labels explicitly or implicitly associated with an individual or  
24 group of individuals. They are manifested, among other things, by the ways in which  
25 individuals are valued or treated according to the category to which they belong. Finally,  
26 *symbols* can be manifested in elements such as attire, access to premises, etc. Identity  
27 can be threatened, "whether by eliminating symbols, disrupting them, eroding them,  
28 replacing them, denying access, or making their expression difficult..." (Ghadiri, 2014, p.  
29 43).

### 30 31 32 **Study context**

33  
34 In 2017, a family medicine clinic created a interdisciplinary quality improvement  
35 committee. The clinic was a large academic primary care group practice located in  
36  
37  
38  
39  
40  
41  
42  
43  
44  
45  
46  
47  
48  
49  
50  
51  
52  
53  
54  
55  
56  
57  
58  
59  
60

1  
2  
3 Montreal, caring for approximately 13,500 patients in collaboration with 80 health  
4 professionals. This clinic has a longstanding tradition of interprofessional care, but no  
5 previous experience with patient involvement in quality improvement. The quality  
6 improvement committee functioned from summer 2017 to summer 2019, a meeting  
7 lasting two hours approximately each two months. Its mandate was to optimize the  
8 management of laboratory results at the clinic. Patient partners (PP) involved on the  
9 committee were recruited by the clinic staff during in the fall of 2017 using the Centre of  
10 Excellence for Patient and Public Partnership recruitment methodology (42).  
11  
12  
13  
14  
15  
16  
17  
18  
19

### 20 ***Study participants***

21 The committee consisted of two PP, seven health professionals (two family physicians,  
22 two family medicine residents, one pharmacist, one nurse clinician and one specialized  
23 nurse practitioner), one secretary, one receptionist, and one manager. All members of  
24 the committee were invited to participate in the ethnographic process. Of these  
25 members, only health professionals and PPs were invited to participate in individual  
26 interviews, as our project focused on health professionals' identities with a clinical care  
27 role. Three members of the committee were also members of the research team (MPC as  
28 a resident in family medicine, PK as a family physician, and GR as a PP).  
29  
30  
31  
32  
33  
34  
35  
36  
37

### 38 ***Data collection***

39 Data collection began in 2017, when the committee was officially created, and ended in  
40 winter 2019. It consisted of participatory observations in a logbook, semi-structured  
41 interviews and the principal investigator's personal diary. Participatory observations  
42 included involvement in the recruitment of PP and attendance of all committee meetings  
43 by MPC, PK and GR. Participatory observations captured summaries of participants'  
44 interventions during the meetings and the decisions taken by the committee. The  
45 participatory observations also included a summary of all informal discussions among  
46 participants and the research team concerning the implication of a PP in the committee.  
47  
48  
49  
50  
51  
52  
53  
54  
55  
56  
57  
58  
59  
60

1  
2  
3 of the research team members to gather feedback on the committee. A summary of these  
4 informal "corridor discussions" was collated by MPC in the logbook. Also, MPC, PK and GR  
5 met one or two times a month to debrief between meetings and to collect their different  
6 observations from their different perspectives. MPC took notes of all these different  
7 debriefs in the logbook.  
8  
9  
10  
11

12  
13 Semi-structured interviews, lasting between 90 and 120 min, were conducted by MPC  
14 with professionals and PP around the end of the committee's mandate. PK and GR were  
15 also officially interviewed by MPC as participant in the committee. The questions in the  
16 interview guide were developed on the basis of Ghadiri's identity markers (ex: - Did you  
17 feel any tensions or conflicts during the process? - What is an ideal PP? – What is the role  
18 of the PP? -What is your role in the committee? Etc.). Ghadiri's conceptual framework  
19 was used during all the data collection process to built our interview guide and to help us  
20 guide our field observations.  
21  
22  
23  
24  
25  
26  
27  
28

29 The principal investigator MPC was herself interviewed by ML (who was not present  
30 during meetings) using clarifying interview techniques. A personal diary also testified to  
31 the principal investigator's impressions and feelings as a family medicine resident  
32 throughout the process. This data was analysed to ensure the plausibility of the process  
33 and of the data collection, as described in participatory ethnography methodologies (34,  
34 43-46).  
35  
36  
37  
38  
39  
40  
41

### 42 ***Data analysis***

43 Qualitative ethnographic analysis by conceptualizing categories as described by Paillé (47)  
44 was used. Data were compiled using QDA Miner software (version 5.0). Analysis was  
45 begun alongside data collection and used iteratively to enhance the data collection itself.  
46 All data collected from participatory observations, logbook notes, and semi-structured  
47 interviews was coded and grouped around major emerging categories by the principal  
48 investigator (MPC) and by ML as a second coder to enhance trustworthiness. The analysis  
49 was then entirely refined by AB and PK. It was then finally refined again by all the research  
50  
51  
52  
53  
54  
55  
56  
57  
58  
59  
60

1  
2  
3 team (MPC, PK, GR, ML, AB). The socioprofessional background of every researcher was  
4 different (resident in family medicine, psychologist, physicians, and patient). The research  
5 team therefore discussed and compared each other's ideas and interpretations until a  
6 consensus was obtained among all researchers, giving the opportunity to enrich the final  
7 analysis.  
8  
9  
10  
11  
12

### 13 **Ethics approval**

14 This project was approved by the ethics committee for research on addiction, social  
15 inequalities, and public health of the *CIUSSS Centre-Sud-de-l'Île-de-Montréal* (DIS-1718-  
16 38). All information was anonymized to protect the identity of the various participants.  
17  
18  
19  
20  
21  
22

### 23 **Patient and public involvement**

24 One patient partner (GR) was involved at several stages of the study, at the same level of  
25 the others co-researchers (PK, ML and AB). All the project's important decisions were  
26 discussed and decided in partnership with the patient. All the co-researchers met on a  
27 regular basis for the duration of the project. GR was involved in the discussion and writing  
28 of the study protocol, the ethics procedures, the data collection and analysis and the  
29 present article's manuscript. GR contributed to the dissemination plan through being a  
30 co-presenter for congress abstract presentations and through the co-authoring of this  
31 present article.  
32  
33  
34  
35  
36  
37  
38  
39  
40  
41  
42

## 43 **3. Results**

44  
45  
46 **Participants.** All participants (n=12) agreed to contribute to the participatory  
47 ethnographic process. Of these participants, all health professionals and PP (n=9) agreed  
48 to participate to individual interviews (RR=100%).  
49  
50  
51  
52

### 53 **Identity markers:**

54  
55  
56 1. *Stories: pioneers threatened in their image of excellence*  
57  
58  
59  
60

1  
2  
3 In interviews, professionals reported a shared collective story that their clinic had always  
4 been known for its strong focus on innovation and quality of care. They all thought that  
5 this new experience of partnering with patients was thus in line with the clinic's tradition,  
6 being rooted in a collective identity of innovation. All concurred that patients had been  
7 integrated as full members of the team during the committee's work. In their initial  
8 comments, no conflicts or tensions were reported: a committee in which their  
9 professionals' collective identity story of innovators was enhanced and did not seem to  
10 have been disrupted in any way (cf Table 1.1.a). However, when probed deeper,  
11 particularly in corridor conversations, professionals indicated that the PP's inclusion was  
12 not accomplished without fear or apprehension (cf Table 1.1.b).

21  
22 During the field observations, there was a level of anxiety felt by professionals during the  
23 first interactions with PP. When certain quality problems were discussed, professionals  
24 were particularly attentive to the PP' reactions, as these discussions were threatening  
25 professionals' collective story of clinical excellence (cf Table 1.1.c). If PP expressed  
26 surprise or disappointment, some professionals quickly sought to minimize the impact of  
27 the problem or defend the professionals' reality.  
28  
29  
30  
31  
32  
33  
34  
35  
36  
37  
38  
39  
40  
41  
42  
43  
44  
45  
46  
47  
48  
49  
50  
51  
52  
53  
54  
55  
56  
57  
58  
59  
60

Table 1. Identity markers : Citations and observations collected

| Identity markers | Citations and observations collected                                                                                                                                                                                                                                                                                                                                                                                                                                                                                                                                                                                                                                                                                                                                                                                                                                                                                                  |
|------------------|---------------------------------------------------------------------------------------------------------------------------------------------------------------------------------------------------------------------------------------------------------------------------------------------------------------------------------------------------------------------------------------------------------------------------------------------------------------------------------------------------------------------------------------------------------------------------------------------------------------------------------------------------------------------------------------------------------------------------------------------------------------------------------------------------------------------------------------------------------------------------------------------------------------------------------------|
| 1.Stories        | <p>a. Citation: “I see everyone is comfortable. I don't feel that... there's any discomfort. I find there's not really any... people aren't holding back, because I know them, and what they're saying, it's what they say in general in their everyday life. It's in the spirit of the times... It wasn't something that... we were against. No one was against that.” – Professional A</p> <p>b. Citation: “Well, I don't think anyone said.... It's not conscious, but to a certain extent, we're afraid of each other.” – Professional M</p> <p>c. Citation: “When we explained our internal problems [in front of patients as partner], it was a little embarrassing, because normally we're supposed to be perfect. That's how it is, in fact, it's like a perfect image. Then, there, we took them behind the scenes.... So then it was a bit embarrassing [to admit] “we're not perfect, you know.” – Professional S</p>      |
| 2.Ideals         | <p>Citation: “This is a departmental priority. Besides that, it's become a priority for the [health authority], it's become a priority for everyone.... They all feel there's a lot of pressure for us to be endorsed by the “patient partner” brand.” – Professional P</p>                                                                                                                                                                                                                                                                                                                                                                                                                                                                                                                                                                                                                                                           |
| 3.Balance        | <p>a. Citation: “We may well be colleagues, but still, they're patients, and I always feel the... urge to provide care, and then we said: ‘we want them to be happy, and do well in there, and feel valued.’” – Professional P</p> <p>b. Citation: “I'd say that, when it's a colleague, I feel more able to confront him.... But when it's a patient... you have to wear... in my thinking, anyway... because he represents the good folks, you have to treat them with kid gloves more often.” – Professional A</p> <p>c. Citation: “(...) At the same time, I see it as a bias, because we're working with two patients who are used to work on committees.” – Professional S</p>                                                                                                                                                                                                                                                  |
| 4.Categorization | <p>a. Citation: “The most important thing for me is to clarify the role, what we're doing around the table, and why we're all here.” – Professional P</p> <p>b. Citation: “Then, because everyone is also a patient... I think that's why... but our patient is more of a patient than we are, his role is to bring that... You know, us, it's not really our role to bring our role as a patient there, either... ” – Professional M</p> <p>c. Observations: certain situations helped increase the PP's legitimacy and clarify the boundaries between PP's and professional's identity:</p> <ol style="list-style-type: none"> <li>I. when PP surprised the team with information or suggestions based on their own care experience that none of the professionals had previously experienced or considered</li> <li>II. when PP contradicted a preconceived notion held by professionals regarding patients' experience</li> </ol> |

|           |                                                                                                                                                                                                                                                                          |
|-----------|--------------------------------------------------------------------------------------------------------------------------------------------------------------------------------------------------------------------------------------------------------------------------|
|           | III. when PP were able to touch team members emotionally with their personal experience of care.                                                                                                                                                                         |
| 5.Symbols | a. Citation: “If I were asked to be a patient partner, I’d like to be paid. Just to say you have a value. It’s not just volunteering. It’s crazy, because we have a system [in which] basically, after all... it seems that your salary is your worth.” – Professional A |

The way in which the professionals spontaneously described their experience was in line with their collective identity story of innovators, working in a pioneer primary care practice. However, corridor discussions revealed a fear that PP’ presence in the “backstage” of professional practice could uncover “imperfections” or “shortcomings” that would undermine professionals’ identity story of excellence.

## 2. *Ideals: Partnership with patients, a new professional ideal*

All professionals concurred that working in partnership is the new “right thing to do” (cf Table 1.2). The professionals therefore worked to ensure the success of the experience to be “good” partners. Professionals mentioned that their relationship with patients should not be hierarchical, but rather built on reciprocity and transparency. Disagreements should be expressed freely and without filters. Our field observations showed that professionals and patients working together felt a need to show stronger connections between each other than what usually occurs in clinical care. For example, the use of informal terms of address (eg. using first names), the sharing of personal stories, and demonstrations of camaraderie between patients and professionals were methods routinely used to demonstrate that they were not in a caregiver relationship, and to illustrate that the professionals were successful in embodying this perception of the new non-hierarchical relationship ideal.

Even as professionals strive to attain the ideal of partnership, they also hold another pre-existing, strong, and deeply entrenched relational ideal: that of the "good caregiver" looking after patients. Particularly present among the physicians in the committee, this ideal is embodied in the image of the caring doctor responsible for his or her patients' well-being. One of the most important objectives for caregivers is to protect the patients' trust in their professionals. Professionals will oppose anything that could jeopardize the trust needed for the care relationship. They are afraid to become too familiar or to reveal flaws or imperfection and believe that, in order to prevent this, they must maintain a professional "healthy distance". This identity ideal is also reinforced by the code of ethics to which professionals adhere (48). Our results, summarized in table 2, showed that these two relational models are based on identity ideals with potentially conflicting requirements.

Table 2. Characteristics of each relational model as perceived by professionals

|                                                    | <b>Caregiver-patient relationship</b> | <b>Colleague-colleague relationship</b> |
|----------------------------------------------------|---------------------------------------|-----------------------------------------|
| <b>Identity of physician</b>                       | Caregiver                             | Colleague                               |
| <b>Identity of patient</b>                         | Recipient of care                     | Colleague                               |
| <b>Relational distance</b>                         | Asymmetrical                          | Symmetrical                             |
| <b>Relational objective (for the professional)</b> | Care                                  | Work                                    |
| <b>Responsibility</b>                              | Carried mainly by professionals       | Shared                                  |

3. *Balance: Identity tensions between patients as colleagues and people being care for*

Data suggests that, in the committee, professionals had two competing identities (colleague and caregiver), with which they had to deal with simultaneously. Even as the professionals aimed to consider PP as colleagues, interviews showed they also viewed them as innocent, vulnerable beings that they felt responsible for (cf Table 1.3.a).



1  
2  
3 After all, professionals consider that the PP who joins the committee is still a patient of  
4 the clinic and, as such, a recipient of care. Consequently, professionals find confronting  
5 the PP very uncomfortable, at least openly (cf Table 1.3.b).  
6  
7  
8  
9

10 If professionals see PP as full members of the team, they will distance them from the  
11 “ordinary” patient and consider that they are all part of the same “professional family”.  
12 However, this was also seen as a negative element by the professionals, since the PP  
13 would no longer be able to adequately embody the identity of an ordinary patient and  
14 would be too far removed from the "real world" (cf Table 1.3.c). This issue was repeatedly  
15 expressed by professionals as a concern regarding the insufficient “representativeness”  
16 of the PP.  
17  
18  
19  
20  
21  
22  
23  
24

25 Corridor conversations and direct observations also revealed another identity tension  
26 among professionals regarding the balance between their identity as colleague and as  
27 caregiver: if a PP asked for a medically-related personal service (e.g. help getting an  
28 appointment with a doctor, medical advice, or a referral), the professional felt  
29 uncomfortable and hesitated about the correct way to respond to this request (as a  
30 doctor? A colleague? A friend?).  
31  
32  
33  
34  
35  
36  
37

#### 38 4. *Categorization: The newcomer, boundaries to be defined*

39

40 The data shows that the boundaries between PP and professional’s identity are  
41 sometimes blurred and that, for professionals, the definition of the PP’s role remains  
42 ambiguous. This complicated the way professionals viewed the PP’s category (cf Table  
43 1.4.a) and, as such, the proper way to work with them. Some professionals noted that if  
44 the discussion touched them personally, they tended to recall their own experiences as a  
45 patient. Thus, they considered that the “patient” label could be applied to them as well.  
46 Professionals therefore expected PP to bring to the table knowledge that was different  
47 from that of other team members (cf Table 1.4.b).  
48  
49  
50  
51  
52  
53  
54  
55  
56  
57  
58  
59  
60

1  
2  
3 Moreover, we observed that certain situations helped increase the PP's legitimacy and  
4 clarify the boundaries between PP's and professional's identity (cf Table 1.4.c). Such cases  
5 help the professional establish an identity boundary that categorizes the PP as  
6  
7 "colleagues with a different expertise".  
8  
9

### 10 11 12 *Symbols: Remuneration, as a symbolic identity issue*

13  
14 Several identity symbols were challenged by PP involvement in the committee. Notably,  
15 PP's remuneration raised not only financial questions, but also questions around roles  
16 and status. Beyond its practical implications (Should they be paid? How much? Who  
17 should pay?), remuneration debates crystalized identity questions (eg. Did a salary imply  
18 employee status? How does it distinguish patient partners with professionals' roles?).  
19 Most of the professionals concluded that, as they all shared the same identity within the  
20 committee, they should all be paid. However, when questioned on the salary PPs should  
21 obtain, professionals showed discomfort. Their opinions were divided because different  
22 professions were paid a different hourly rate for their participation. Some of them  
23 expressed their beliefs that PPs should not be paid more than the lowest paid participant  
24 around the table. At the same time, they expressed concern about the fact that PPs  
25 should not be the lowest paid participant since they felt someone's value was somewhat  
26 reflected in their salary (cf Table 1.5.a.).  
27  
28  
29  
30  
31  
32  
33  
34  
35  
36  
37  
38

39 Other symbols have raised questions rooted in the professionals' perception of the PP's  
40 dual identity as colleagues and users of care. For example, granting PP clinic access card  
41 and the nature of their confidentiality obligations were the subject of several discussions  
42 in the committee.  
43  
44  
45  
46  
47  
48

## 49 **4. Discussion**

50  
51  
52 This study reports and interprets how working with patients is a new way of entering into  
53 relationships and how this transforms the identity of professionals. Even if, in this study,  
54  
55  
56  
57  
58

1  
2  
3 all participants agreed that the experience was a success in terms of partnership with  
4 patients, transforming the “caregiver–patient” relationship into a “colleague-colleague”  
5 relationship generated identity upheavals among the professionals, relating to the “good  
6 professional” ideal, the impermeability of the patient and professional categories, the  
7 interweaving of the symbols associated with these identities, and the inner balance  
8 between the roles of carer and colleague. Professionals struggle with this dual identity  
9 and transfer this ambiguity on their perception of the patient’s identity as a “real patient”  
10 or not. This could explain some professionals’ perception of PP identity mentioned in the  
11 literature as ambiguous and poorly defined (15, 49).  
12  
13  
14  
15  
16  
17  
18  
19  
20

21 Given the coexistence of multiple identities, striking a balance between them brings many  
22 challenges for the professional. While balancing identities is complex, professionals  
23 cannot relinquish either of their identity ideals without consequence. On one hand, if  
24 professionals perceive the patient as sufficiently distanced from this image of care  
25 receiver, they will feel comfortable to work in a colleague-colleague relationship. The  
26 energy will be focused more on productivity than on creating a positive relational  
27 experience. On the other hand, if the professional sees the PP as too far removed from  
28 what is considered an “ordinary patient” identity, the professional will consider the  
29 person’s presence to be less legitimate, even irrelevant. This is mainly because the  
30 professional grants the person legitimacy on the basis of a patient identity, while giving  
31 the person access to real relational reciprocity on the basis of a co-worker identity.  
32  
33  
34  
35  
36  
37  
38  
39  
40  
41

42 The important contribution of this study is to import an identity analytical framework to  
43 help understand challenges of PP implementation. This provide an interpretive reading  
44 that is original and different from the current literature, shedding light on certain issues  
45 frequently encountered in the field (e.g professionals’ resistance to working with  
46 patients, merely symbolic involvement of patients, remuneration, patients’ status and  
47 unequal power relationships between professionals and PP, professionals’ concerns  
48 toward patient “representativeness”)(3, 15-18, 21, 22, 49-52) that could be indicative of  
49 underlying identity tensions between patients and health professionals.  
50  
51  
52  
53  
54  
55  
56  
57  
58  
59  
60

## Strengths, limitations, and future research

The methodology used (participatory ethnographic approach) carried out over a period of more than two years, enriched the understanding of the phenomenon under study, allowing researchers to have access to informal corridor discussions that helped uncover identity tensions that were not obvious in formal interviews. This methodology follows in the footsteps of recent literature striving for the study of complexity in health services (53-56).

Observations were conducted by multiple observers (two family doctors and one patient) on the same meetings which is, in our opinion, a strength for the analysis process. However, because the ethnographic approach was used in a single setting, the analysis focused more on one primary care team identity, whereas a multiple case study in several types of professional environments would have made it possible to contrast the impact of relational changes on professionals' collective identity. Also, to uncover as many potential issues as possible, we chose to study a team undergoing its first experience of working in partnership. It would be interesting to see whether similar results would emerge with a more experienced team, in which the balance and tensions between different identities might have already stabilized to some extent over time. On the other hand, working with a team that was relatively new to the subject was potentially more conducive to exposing the identity shock that resulted when relationships were transformed from caregiver–patient to colleague–colleague. Future research is also needed to better understand identity issues experienced by patient partners.

Finally, some might conclude that this research calls for ways to help professionals minimize these identity tensions. However, it is important to consider whether, in essence, creating identity tensions is not the very strength of working in partnership with patients. This would perhaps need to be questioned yet again if ambiguity and relational discomfort were to disappear and be replaced by a relationship that is too “complacent”.

## 5. Conclusion

This research provides a new perspective on understanding how working in partnership with patients transform health professionals' identity. When they are called to work with patients outside of a simple therapeutic relationship, health professionals may feel tensions between their identity as caregivers and their identity as colleague. This allows us to better understand some underlying tensions elicited by the arrival of different patient engagement initiatives (e.g professionals' resistances to working with patients, patients' status and remuneration, professionals' concerns toward patient "representativeness"). Partnership with patients imply the construction of a new relational framework, flexible and dynamic, that takes into account this co-existence of identities.

### Contributorship statement

This study was conducted in the context of primary author's Master degree (MPC). MPC, PK, GR and AB designed and conducted the study. The data collection was done by MPC. The coding was done by MPC and ML. The data analysis was done by all co-authors (MPC, PK, GR, AB and ML). MPC prepared the manuscript draft with important intellectual input from all the other co-authors. All authors approved the final manuscript and the revised version.

### Competing interest's declaration:

All authors have completed the ICMJE uniform disclosure form at [www.icmje.org/coi\\_disclosure.pdf](http://www.icmje.org/coi_disclosure.pdf) and declare:

- MPC, GR, PK and AB are part of the CEPPP team (Center of Excellence for Partnership with Patients and the Public ). AB and PK are both Co-directors of the Center of Excellence for Partnership with Patients and the Public in Montreal; AB is the Chairholder of the Canada Research Chair in Patient and Public Partnership ;
- This project received the Patient's Medical Home 60/20 Caring and Compassion Grant (4000\$) and the University of Montreal Interfaculty Operational Committee grant (7500\$).

I, Marie-Pierre Codsí, affirms that the researchers work was totally independent from funders.

We declare no other relationships or activities that could appear to have influenced the submitted work.

### Copyright

1  
2  
3 I, Marie-Pierre Codsí, has the right to grant on behalf of all authors and does grant on  
4 behalf of all authors, an exclusive licence on a worldwide basis to the BMJ Publishing  
5 Group Ltd to permit this article (if accepted) to be published in BMJ editions and any  
6 other BMJ PGL products and sublicences such use and exploit all subsidiary rights, as set  
7 out in our licence.  
8  
9

10  
11  
12  
13 **Guarantor:** Marie-Pierre Codsí ([marie-pierre.codsi@umontreal.ca](mailto:marie-pierre.codsi@umontreal.ca))  
14  
15

16  
17 **Transparency declaration:** I, Marie-Pierre Codsí, affirms that this manuscript is an honest,  
18 accurate, and transparent account of the study being reported; that no important aspects  
19 of the study have been omitted; and that any discrepancies from the study as planned  
20 have been explained.  
21  
22  
23

24  
25  
26 **Ethics approval:** The project was approved by the ethics committee for research on  
27 addiction, social inequalities, and public health of the *CIUSSS Centre-Sud-de-l'Île-de-*  
28 *Montréal* (DIS-1718-38).  
29  
30  
31

32  
33  
34 This project involved to related component

- 35  
36 1. A quality improvement component (the quality improvement committee on lab  
37 results), whose approval is under the authority of the health institution (detailed below)  
38  
39 2. A research component (reported in this article, including participant observation and  
40 individual interviews), which was approved by the research ethics committee for research  
41 on addiction, social inequalities, and public health of the *CIUSSS Centre-Sud-de-l'Île-de-*  
42 *Montréal* (DIS-1718-38).  
43  
44  
45

46  
47 An agreement was reached from the clinic's medical Chief to allow the research team to  
48 be integrated into the committee. All members of the committee agreed to have the  
49 research team join the committee as part of a participatory ethnographic approach. For  
50 the members of the committee, their participation in the Quality Improvement  
51 Committee was not conditional on their participation in the research project. They were  
52 free to withdraw, at any time, both from the committee and from the research project.  
53  
54  
55  
56  
57  
58  
59  
60

1  
2  
3 One of the patient partners was being followed medically at the clinic itself. However,  
4 members of this patient's health care team were not on the committee. Moreover, our  
5 interest in study was the experience of professionals and not that of the patient.  
6  
7  
8  
9

10 Interview transcripts were anonymized before being analyzed. Only the principal  
11 investigator had access to the participants' names in the transcripts. Observations, as well  
12 as logbook data, were also anonymized. Because our group of participants was relatively  
13 small, we decided not to separate the different types of caregivers (pharmacist, nurse,  
14 doctor, etc.) and group them under the same label of "health professionals" in order to  
15 protect the confidentiality of participants. However, the risk of some members  
16 recognizing other participants in the excerpts cited remains possible. This was mentioned  
17 in the consent form.  
18  
19  
20  
21  
22  
23  
24  
25  
26  
27  
28

29 **Funding:** This project received the Patient's Medical Home 60/20 Caring and Compassion  
30 Grant (4000\$) and the University of Montreal Interfaculty Operational Committee grant  
31 (7500\$).  
32  
33  
34  
35

36 *Details of the role of the study sponsors:* I, Marie-Pierre Codosi, affirms that the  
37 researchers work was totally independent from funders.  
38  
39  
40  
41

42 **Patient and public involvement:** One patient partner (GR) was involved at several stages  
43 of the study, at the same level of the others co-researchers (PK, ML and AB). All the  
44 project's important decisions were discussed and decided in partnership with the patient.  
45 All the co-researchers met on a regular basis for the duration of the project. The patient  
46 partner was involved in the discussion and creation of the study protocol, the ethics  
47 procedures, the data analysis and the present article's manuscript. She contributed to the  
48 dissemination plan through being a co-presenter for congress abstract presentations and  
49 through the co-authoring of this present manuscript.  
50  
51  
52  
53  
54  
55  
56  
57  
58  
59  
60



1  
2  
3  
4  
5 **Dissemination declaration:** We plan to disseminate the results to study participants  
6 and to patient organisations.  
7  
8  
9

10 **Data sharing:** Data are available upon reasonable request (Individual participant data  
11 that  
12 underlie the results reported in this article, after deidentification, study protocol,  
13 informed Consent Form, Analytic Code).  
14  
15  
16  
17  
18  
19  
20

21 **\*\*\*This article follows the guidelines by the European Medical Writers' Association on**  
22 **the role of professional medical writers. \*\*\***  
23  
24  
25  
26  
27  
28  
29  
30  
31  
32  
33  
34  
35  
36  
37  
38  
39  
40  
41  
42  
43  
44  
45  
46  
47  
48  
49  
50  
51  
52  
53  
54  
55  
56  
57  
58  
59  
60

1  
2  
3  
4  
5  
6  
7  
8  
9  
10  
11  
12  
13  
14  
15  
16  
17  
18  
19  
20  
21  
22  
23  
24  
25  
26  
27  
28  
29  
30  
31  
32  
33  
34  
35  
36  
37  
38  
39  
40  
41  
42  
43  
44  
45  
46  
47  
48  
49  
50  
51  
52  
53  
54  
55  
56  
57  
58  
59  
60

For peer review only

## Bibliography

1. Park RE. Race and culture: Free Press; 1950. 403 p.
2. Fleurence R, Selby JV, Odom-Walker K, Hunt G, Meltzer D, Slutsky JR, et al. How the Patient-Centered Outcomes Research Institute is engaging patients and others in shaping its research agenda. *Health Affairs*. 2013;32(2):393-400.
3. Bombard Y, Baker GR, Orlando E, Fancott C, Bhatia P, Casalino S, et al. Engaging patients to improve quality of care: a systematic review. *Implementation Science*. 2018;13(1):98.
4. Russell J, Greenhalgh T, Taylor M. Patient and public involvement in NIHR research 2006-2019: policy intentions, progress and themes. 2019.
5. Clavel N, Pomey M-P, Ghadiri DPS. Partnering with patients in quality improvement: towards renewed practices for healthcare organization managers? *BMC health services research*. 2019;19(1):815.
6. Coulter A. Paternalism or partnership?: Patients have grown up—and there's no going back. British Medical Journal Publishing Group; 1999.
7. Richards T. Tessa Richards: Transforming healthcare—one flower at a time. *Thebmjopinion*. BMJ2019.
8. Karazivan P, Dumez V, Flora L, Pomey MP, Del Grande C, Ghadiri DP, et al. The patient-as-partner approach in health care: a conceptual framework for a necessary transition. *Acad Med*. 2015;90(4):437-41.
9. Barry MJ, Edgman-Levitan S. Shared decision making—the pinnacle of patient-centered care. *New England Journal of Medicine*. 2012;366(9):780-1.
10. Bodenheimer T, Lorig K, Holman H, Grumbach K. Patient self-management of chronic disease in primary care. *Jama*. 2002;288(19):2469-75.
11. Tattersall RL. The expert patient: a new approach to chronic disease management for the twenty-first century. *Clin Med (Lond)*. 2002;2(3):227-9.
12. Boivin A, Penafiel M, Rouly G, Lahaie V, Codsí M-P, Isabel M, et al. *TheBMJopinion* [Internet]. BMJ, editor2020. [cited 2020]. Available from: <https://blogs.bmj.com/bmj/2020/04/07/covid-19-a-pivotal-moment-in-community-care/>
13. Quirion R. Création du Réseau québécois COVID. Gouvernement du Québec; 2020.
14. Jackson M, Descôteaux A, Nicaise L, Flora L, Berkesse A, Codsí M-P, et al. Former en ligne au recrutement de patients partenaires : l'apport des formations par concordance. *Pédagogie Médicale*. 2020.
15. Barber R, Boote JD, Parry GD, Cooper CL, Yeeles P, Cook S. Can the impact of public involvement on research be evaluated? A mixed methods study. *Health Expect*. 2012;15(3):229-41.
16. Lough S. Need to define patient engagement in research. *Can Med Assoc*; 2015.
17. Staniszewska S, Mockford C, Gibson A, Herron-Marx S, Putz R. Moving Forward: Understanding the Negative Experiences and Impacts of Patient and Public Involvement in Health Service Planning, Development, and Evaluation.

- Critical perspectives on user involvement edn Edited by Barnes M, Cotterell P  
Bristol: Policy. 2012:129-41.
18. Domecq JP, Prutsky G, Elraiyah T, Wang Z, Nabhan M, Shippee N, et al. Patient engagement in research: a systematic review. *BMC Health Services Research*. 2014;14(1):89.
  19. Aubin D, Hebert M, Eurich D. The importance of measuring the impact of patient-oriented research. *CMAJ: Canadian Medical Association journal= journal de l'Association medicale canadienne*. 2019;191(31):E860.
  20. Saraga M. Transparence, transfert et patient partenaire. *Psycho-Oncologie*. 2018;12(1):24-8.
  21. O'Shea A, Boaz AL, Chambers M. A hierarchy of power: the place of patient and public involvement in healthcare service development. *Frontiers in Sociology*. 2019;4.
  22. Montreuil M, Martineau JT, Racine E. Exploring Ethical Issues Related to Patient Engagement in Healthcare: Patient, Clinician and Researcher's Perspectives. *Journal of bioethical inquiry*. 2019:1-12.
  23. Boivin A, Lehoux P, Burgers J, Grol R. What are the key ingredients for effective public involvement in health care improvement and policy decisions? A randomized trial process evaluation. *Milbank Quarterly*. 2014;92(2):319-50.
  24. Boivin A, Richards T, Forsythe L, Grégoire A, L'Espérance A, Abelson J, et al. Evaluating patient and public involvement in research. *British Medical Journal Publishing Group*; 2018.
  25. Aldcroft A. New requirements for patient and public involvement statements in BMJ Open. *BMJ Open*. 2018.
  26. Carman KL, Dardess P, Maurer M, Sofaer S, Adams K, Bechtel C, et al. Patient and family engagement: a framework for understanding the elements and developing interventions and policies. *Health Aff (Millwood)*. 2013;32(2):223-31.
  27. Parsons T. The sick role and the role of the physician reconsidered. *Milbank Mem Fund Q Health Soc*. 1975;53(3):257-78.
  28. Richards T. Patient leaders—healthcare's untapped workforce. *TheBMJopinion* [Internet]. 2017. Available from: <https://blogs.bmj.com/bmj/2017/12/22/tessa-richards-patient-leaders-healthcares-untapped-workforce/>.
  29. Conroy SA, O'Leary-Kelly AM. Letting go and moving on: Work-related identity loss and recovery. *Academy of Management Review*. 2014;39(1):67-87.
  30. Ghadiri DP. Quand le changement menace l'identité. *Gestion*. 2014;39(1):38-47.
  31. Branscombe NR, Ellemers N, Spears R, Doosje B. The context and content of social identity threat. *Social identity: Context, commitment, content*. 1999:35-58.
  32. Fiol CM, Pratt MG, O'Connor EJ. Managing intractable identity conflicts. *Academy of Management Review*. 2009;34(1):32-55.
  33. Ford JD, Ford LW. Decoding resistance to change. *Harvard business review*. 2009;87(4):99-103.
  34. Blomberg J, Karasti H. Positioning ethnography within participatory design. *Routledge international handbook of participatory design*. 2012:86-116.

- 1  
2  
3 35. Diaz F. L'observation participante comme outil de compréhension du champ  
4 de la sécurité. Récit d'un apprentissage de l'approche ethnographique pour tenter  
5 de rendre compte de la complexité du social. *Champ pénal/Penal field*. 2005;2.  
6 36. Gérin-Lajoie D. L'utilisation de l'ethnographie dans l'analyse du rapport à  
7 l'identité. *Éducation et sociétés*. 2006(1):73-87.  
8 37. Lapassade G. L'observation participante. *Revista Europeia de Etnografia da*  
9 *Educação*. 2001;1(1):9-26.  
10 38. Mehan H, Wood H. The morality of ethnomethodology. *Theory and Society*.  
11 1975;2(1):509-30.  
12 39. Gold RL. Roles in sociological field observations. *Soc F*. 1957;36:217.  
13 40. Kawulich BB, editor Participant observation as a data collection method.  
14 *Forum qualitative sozialforschung/forum: Qualitative social research*; 2005.  
15 41. Goffman E, Kihm A. *La mise en scène de la vie quotidienne: Minuit Paris*;  
16 1973.  
17 42. DCP. Guide de pratique: Recrutement des patients partenaires. Faculté de  
18 médecine: Université de Montréal; 2015.  
19 43. Ellis C, Bochner A. Autoethnography, personal narrative, reflexivity:  
20 Researcher as subject. 2000.  
21 44. Rondeau K. L'autoethnographie: une quête de sens réflexive et conscientisée  
22 au cœur de la construction identitaire. *Recherches qualitatives*. 2011;30(2):48-70.  
23 45. Dubé G. L'autoethnographie, une méthode de recherche inclusive. Repéré de  
24 [https://www](https://www.uqar.ca/uqar/universite/a-propos-deluqar/departements/psychosociologie_et_travail_social/presences-vol9-2-dubelautoethnographie-une-methode-de-recherche-inclusive.pdf)  
25 [uqar ca/uqar/universite/a-propos-](https://www.uqar.ca/uqar/universite/a-propos-deluqar/departements/psychosociologie_et_travail_social/presences-vol9-2-dubelautoethnographie-une-methode-de-recherche-inclusive.pdf)  
26 [deluqar/departements/psychosociologie\\_et\\_travail\\_social/presences-vol9-2-](https://www.uqar.ca/uqar/universite/a-propos-deluqar/departements/psychosociologie_et_travail_social/presences-vol9-2-dubelautoethnographie-une-methode-de-recherche-inclusive.pdf)  
27 [dubelautoethnographie-une-methode-de-recherche-inclusive](https://www.uqar.ca/uqar/universite/a-propos-deluqar/departements/psychosociologie_et_travail_social/presences-vol9-2-dubelautoethnographie-une-methode-de-recherche-inclusive.pdf) pdf. 2016.  
28 46. Chang H. Individual and collaborative autoethnography as method.  
29 *Handbook of autoethnography*. 2013:107-22.  
30 47. Paillé P, Mucchielli A. *L'analyse qualitative en sciences humaines et sociales-*  
31 *4e éd: Armand Colin*; 2016.  
32 48. Collège des médecins du Québec. Code of ethics of physicians 2019 [Available  
33 from: <http://www.cmq.org/page/en/code-de-deontologie-des-medecins.aspx>.  
34 49. Brett J, Staniszewska S, Mockford C, Seers K, Herron-Marx S, Bayliss H. The  
35 PIRICOM Study: A systematic review of the conceptualisation, measurement, impact  
36 and outcomes of patients and public involvement in health and social care research.  
37 2010.  
38 50. Maguire K, Britten N. "How can anybody be representative for those kind of  
39 people?" Forms of patient representation in health research, and why it is always  
40 contestable. *Social Science & Medicine*. 2017;183:62-9.  
41 51. Renedo A, Komporozos-Athanasίου A, Marston C. Experience as evidence:  
42 The dialogic construction of health professional knowledge through patient  
43 involvement. *Sociology*. 2018;52(4):778-95.  
44 52. Pomey MP, Ghadiri DP, Karazivan P, Fernandez N, Clavel N. Patients as  
45 partners: a qualitative study of patients' engagement in their health care. *PLoS One*.  
46 2015;10(4):e0122499.  
47 53. Greenhalgh T, Papoutsi C. Studying complexity in health services research:  
48 desperately seeking an overdue paradigm shift. *BioMed Central*; 2018.  
49  
50  
51  
52  
53  
54  
55  
56  
57  
58  
59  
60

- 1  
2  
3 54. Braithwaite J, Churrua K, Long JC, Ellis LA, Herkes J. When complexity  
4 science meets implementation science: a theoretical and empirical analysis of  
5 systems change. BMC medicine. 2018;16(1):63.  
6  
7 55. Plsek PE, Wilson T. Complexity, leadership, and management in healthcare  
8 organisations. Bmj. 2001;323(7315):746-9.  
9  
10 56. Craig P, Dieppe P, Macintyre S, Michie S, Nazareth I, Petticrew M. Developing  
11 and evaluating complex interventions: the new Medical Research Council guidance.  
12 Bmj. 2008;337:a1655.  
13  
14  
15  
16  
17  
18  
19  
20  
21  
22  
23  
24  
25  
26  
27  
28  
29  
30  
31  
32  
33  
34  
35  
36  
37  
38  
39  
40  
41  
42  
43  
44  
45  
46  
47  
48  
49  
50  
51  
52  
53  
54  
55  
56  
57  
58  
59  
60

## SRQR Guidelines fo Qualitative Research \_ BMJOpen

|                                                                                         |            |
|-----------------------------------------------------------------------------------------|------------|
| <b>Title and abstract</b>                                                               |            |
| Title                                                                                   | p.1        |
| Abstract                                                                                | p.4        |
| <b>Introduction</b>                                                                     |            |
| problem formulation                                                                     | p.6 (L19)  |
| purpose                                                                                 | p.7 (L3)   |
| <b>Methods</b>                                                                          |            |
| Qualitative approach                                                                    | p.7 (L17)  |
| researcher characteristics and reflexivity                                              | p.7 (L17)  |
| context                                                                                 | p.8 (L25)  |
| sampling strategy                                                                       | p.9 (L8)   |
| ethical issu                                                                            | p.10 (L25) |
| data collection                                                                         | p.9 (L17)  |
| units of study                                                                          | p.9 (L19)  |
| data processing                                                                         | p.10 (L12) |
| data analysis                                                                           | p.10 (L17) |
| techniques to enhance trusworthiness                                                    | p.10 (L15) |
| <b>Results and findings</b>                                                             |            |
| synthesis and interpretation                                                            | p.17 (L2)  |
| links to empirical data                                                                 | p.17 (L27) |
| <b>Discussion</b>                                                                       |            |
| integration to prior work, implications, transferability, adn contribution to the field | p.17 (L24) |
| limitations                                                                             | p.18 (L14) |
| <b>Others</b>                                                                           |            |
| conflicts of interest                                                                   | p.2 (L23)  |
| funding                                                                                 | p.20 (23)  |
